# Supplementary material for: Development of Novel Quinoline-Based Sulfonamides as Selective Cancer-Associated Carbonic Anhydrase Isoform IX Inhibitors
Source: MDPI journal article supplement (doi:10.3390/ijms222011119), 2021-10-15

Wagdy Eldahna-QNS-9a-MS-Proton.10.1.1r  
Wagdy Eldahna-QNS-9a-MS-Proton

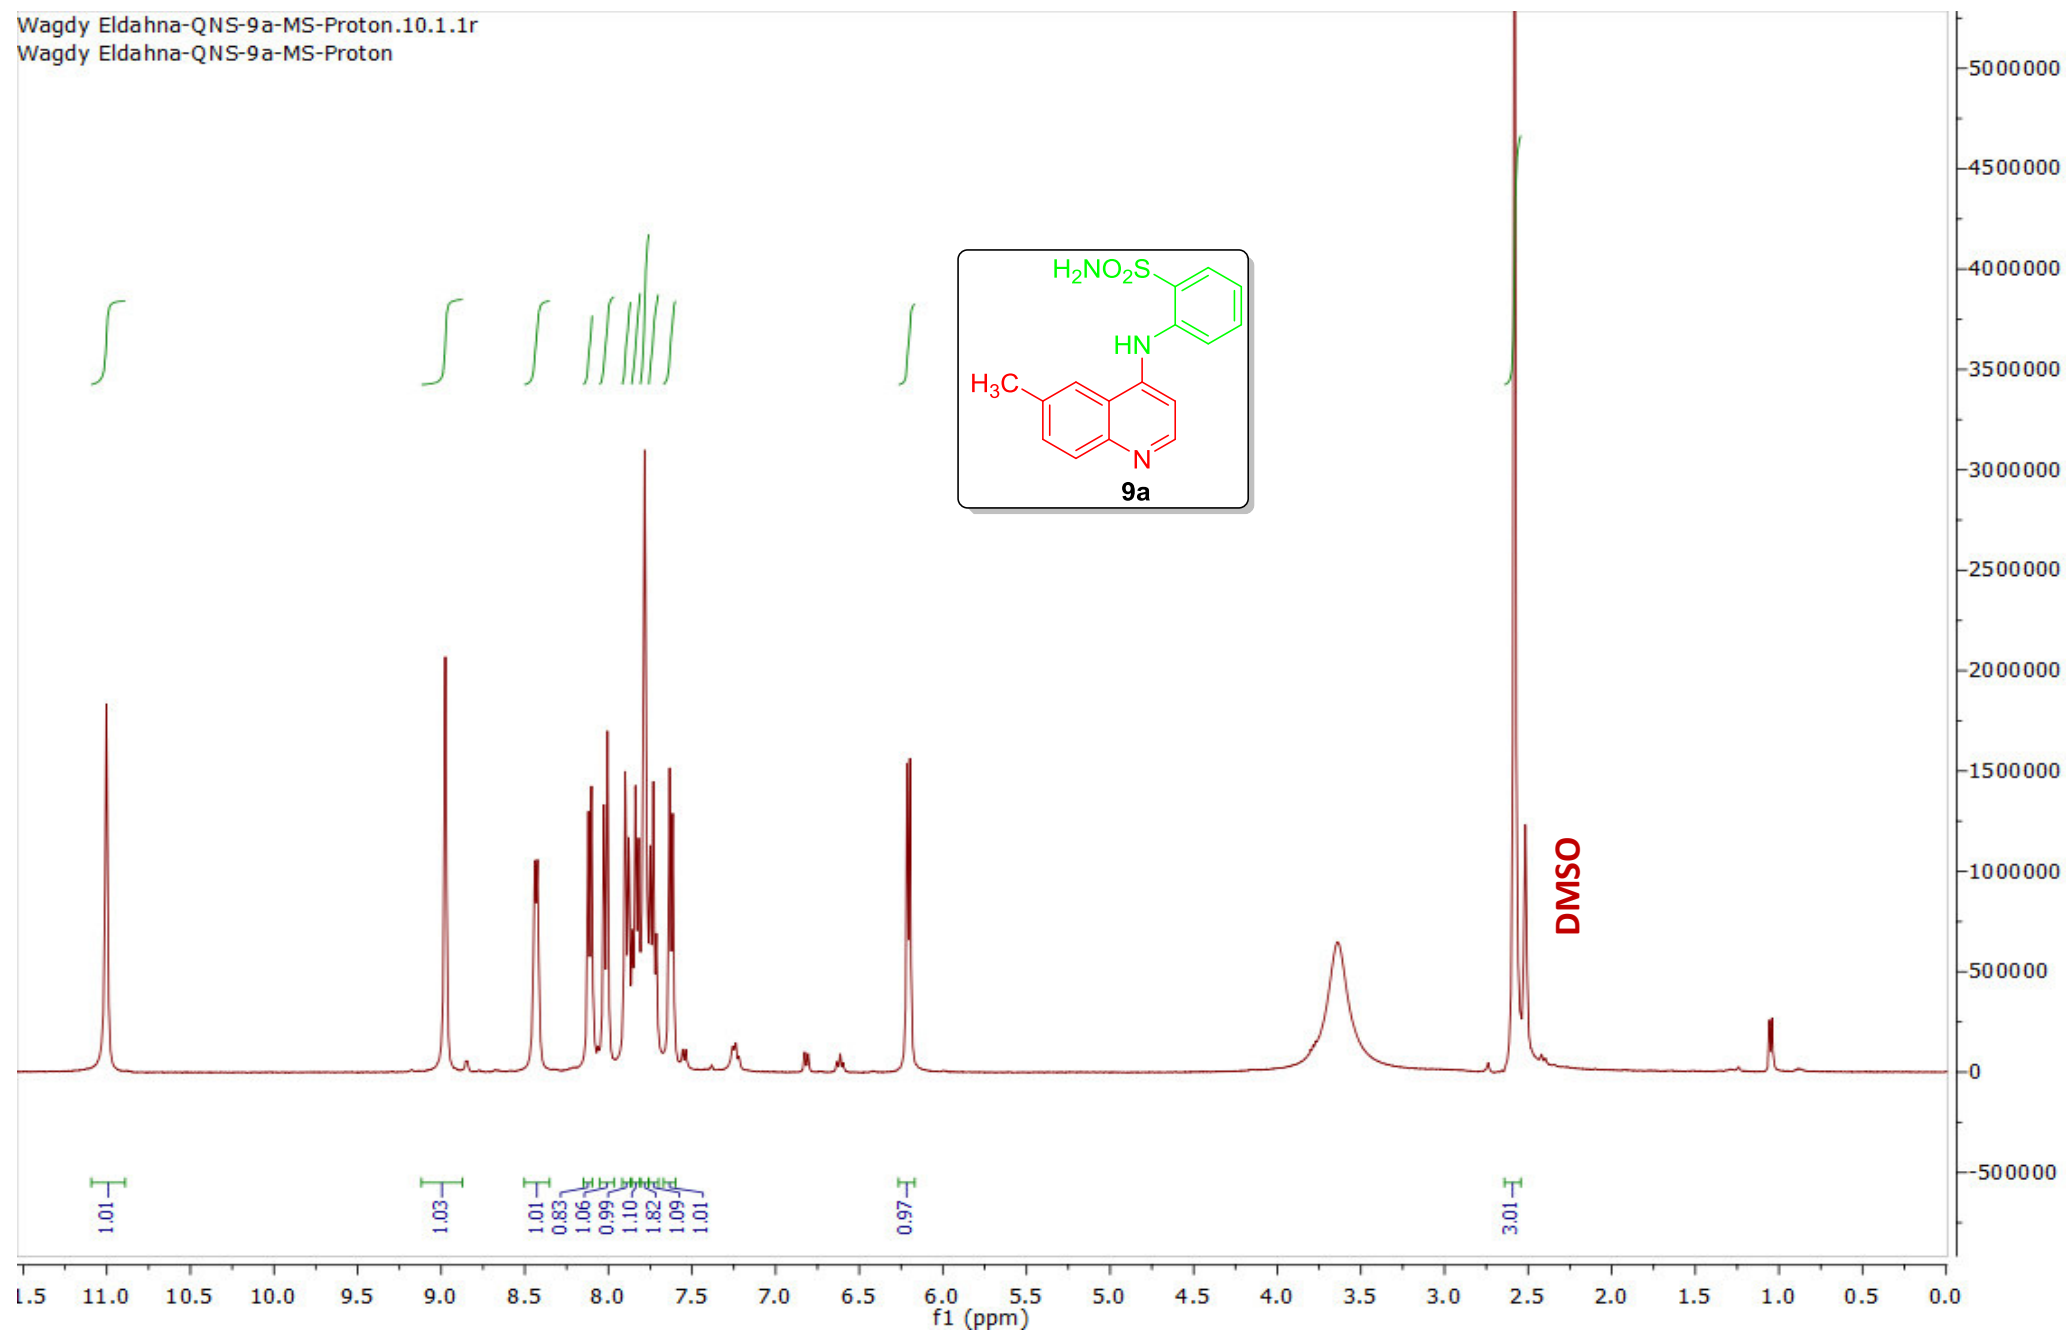

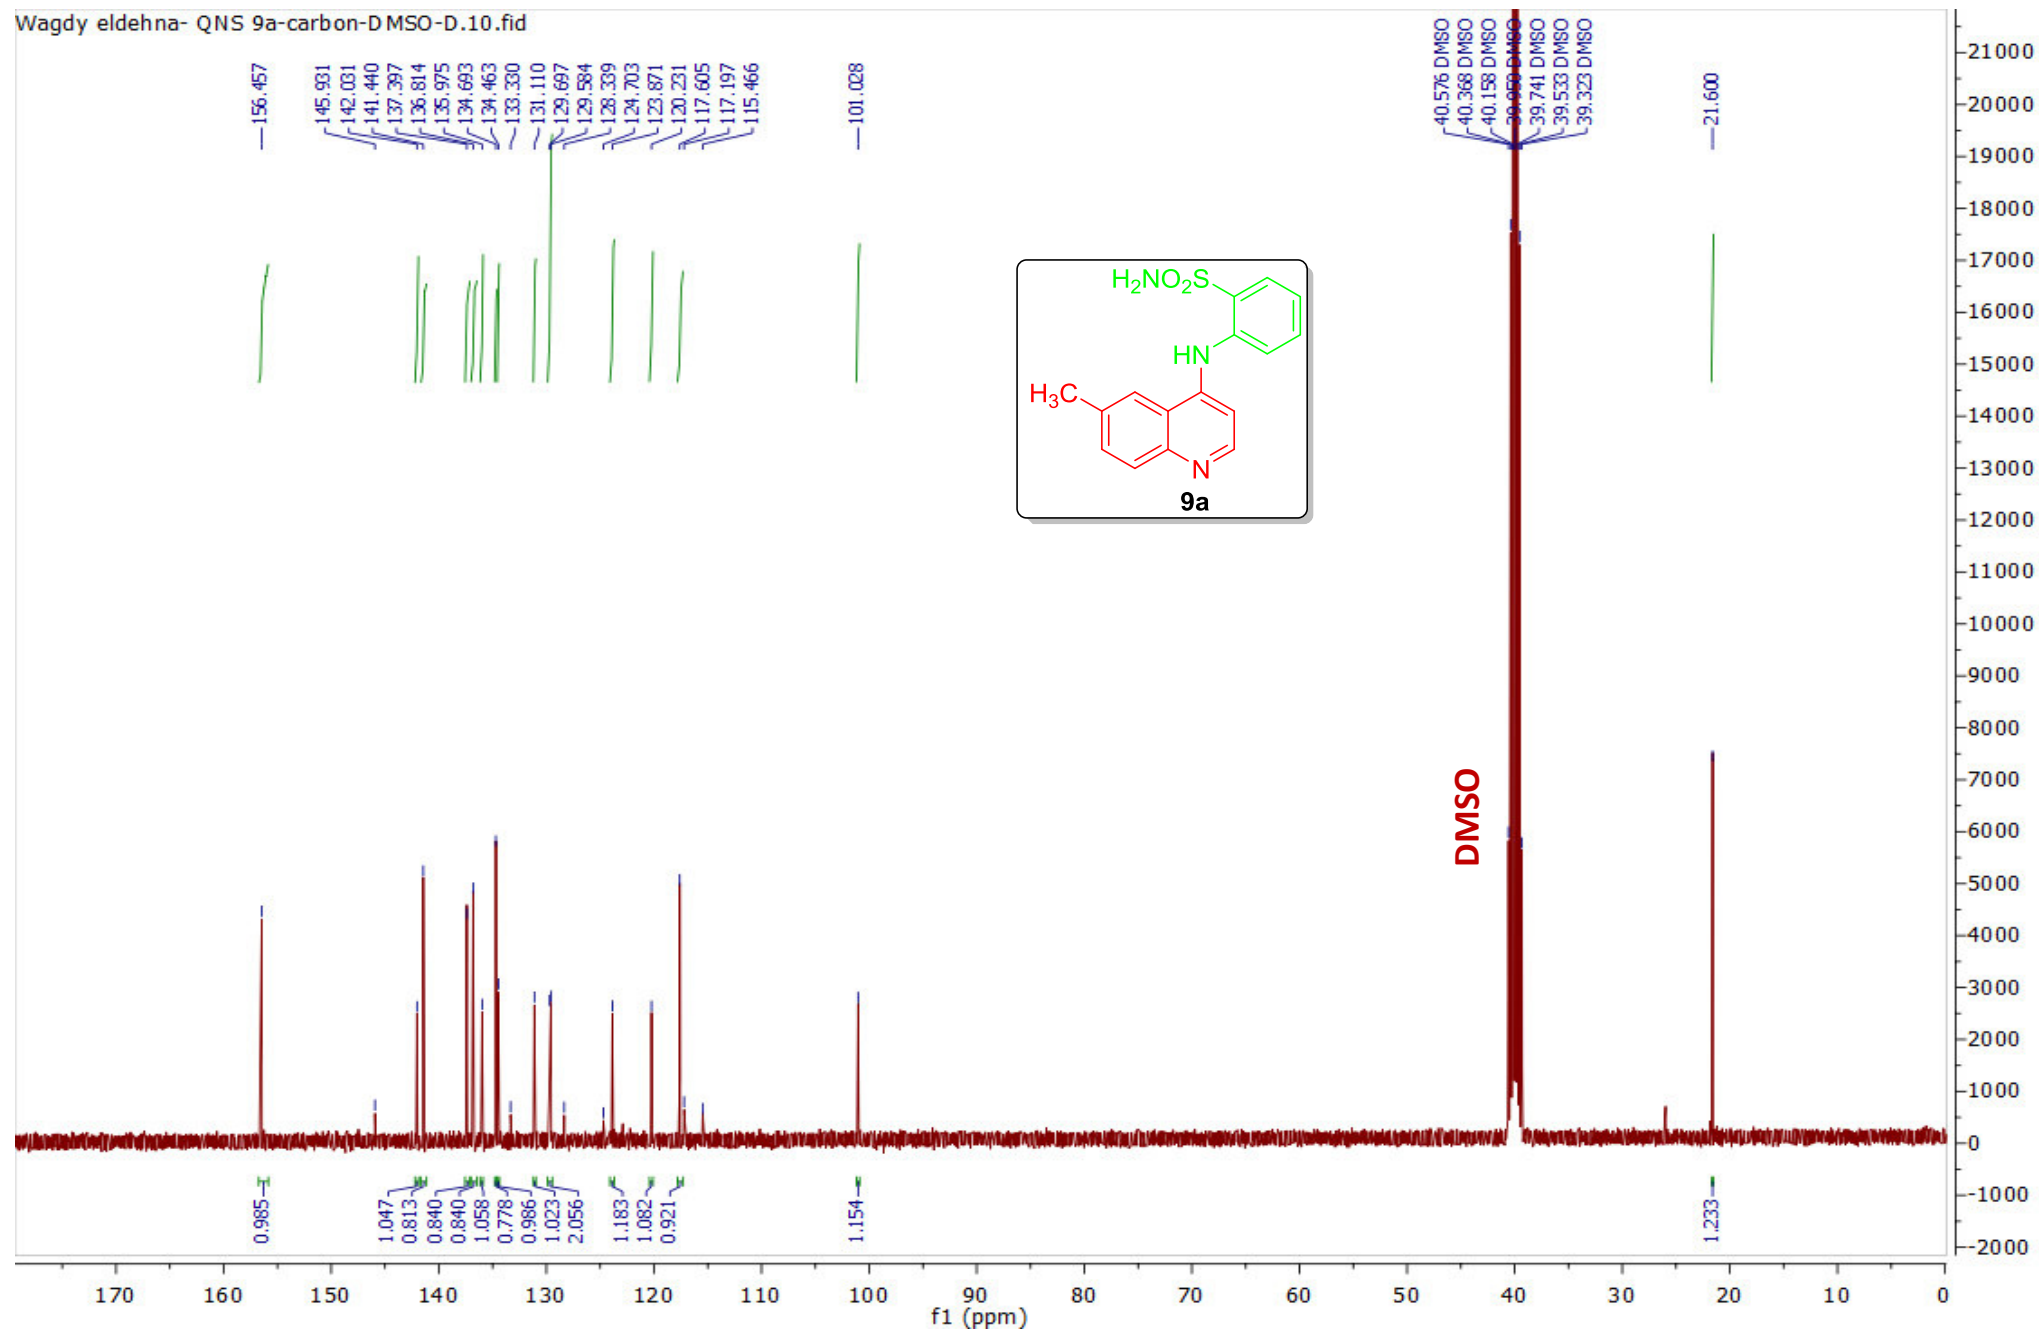

Wagdy Eldahna-QNS-9b-MS-Proton.10.1.1r  
Wagdy Eldahna-QNS-9b-MS-Proton

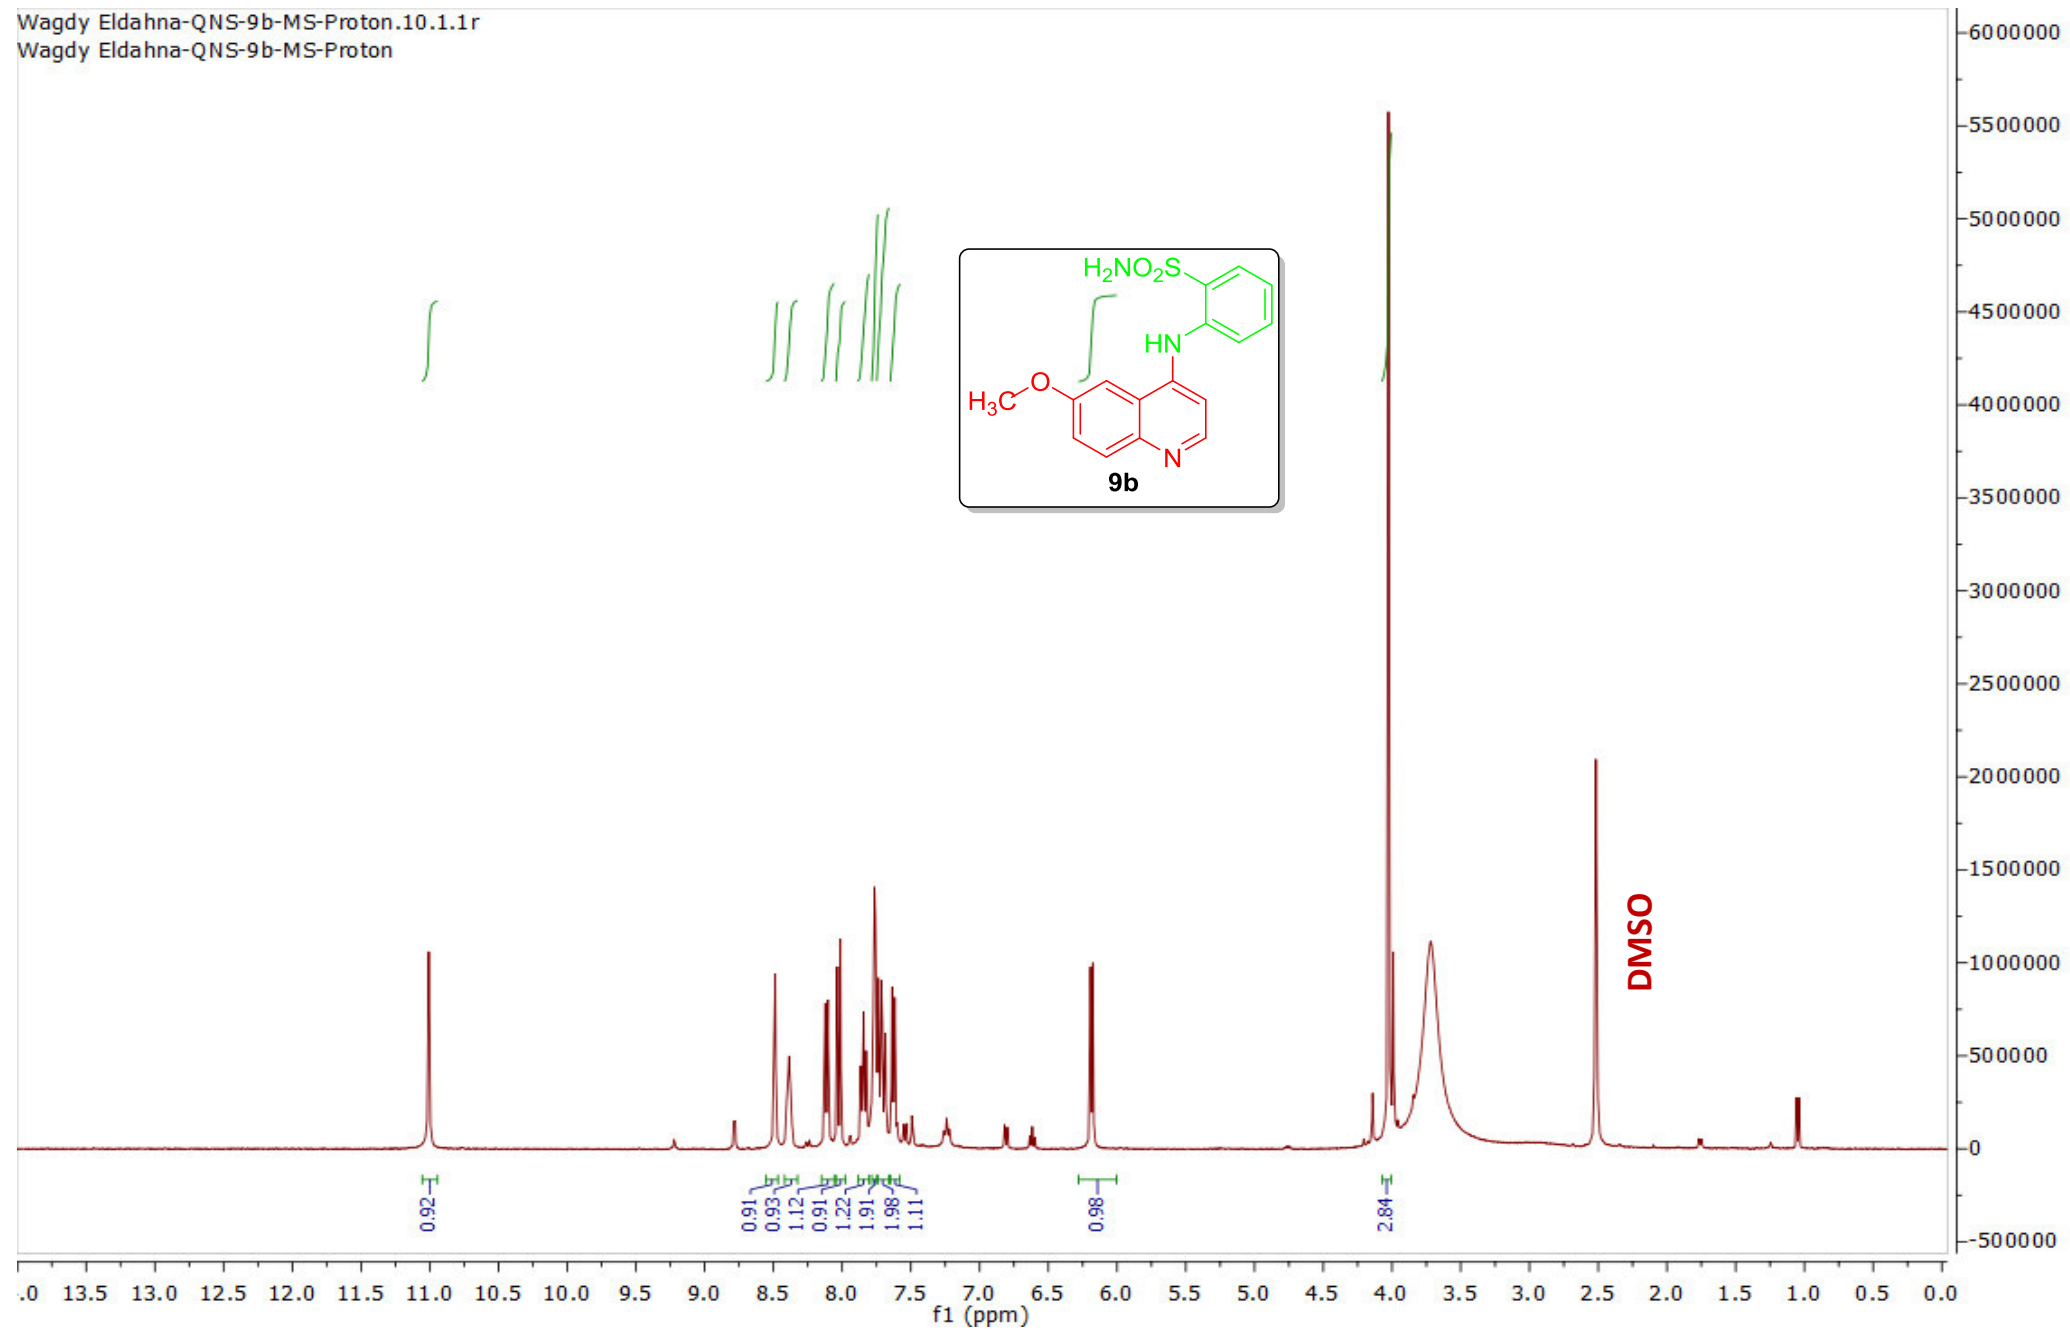

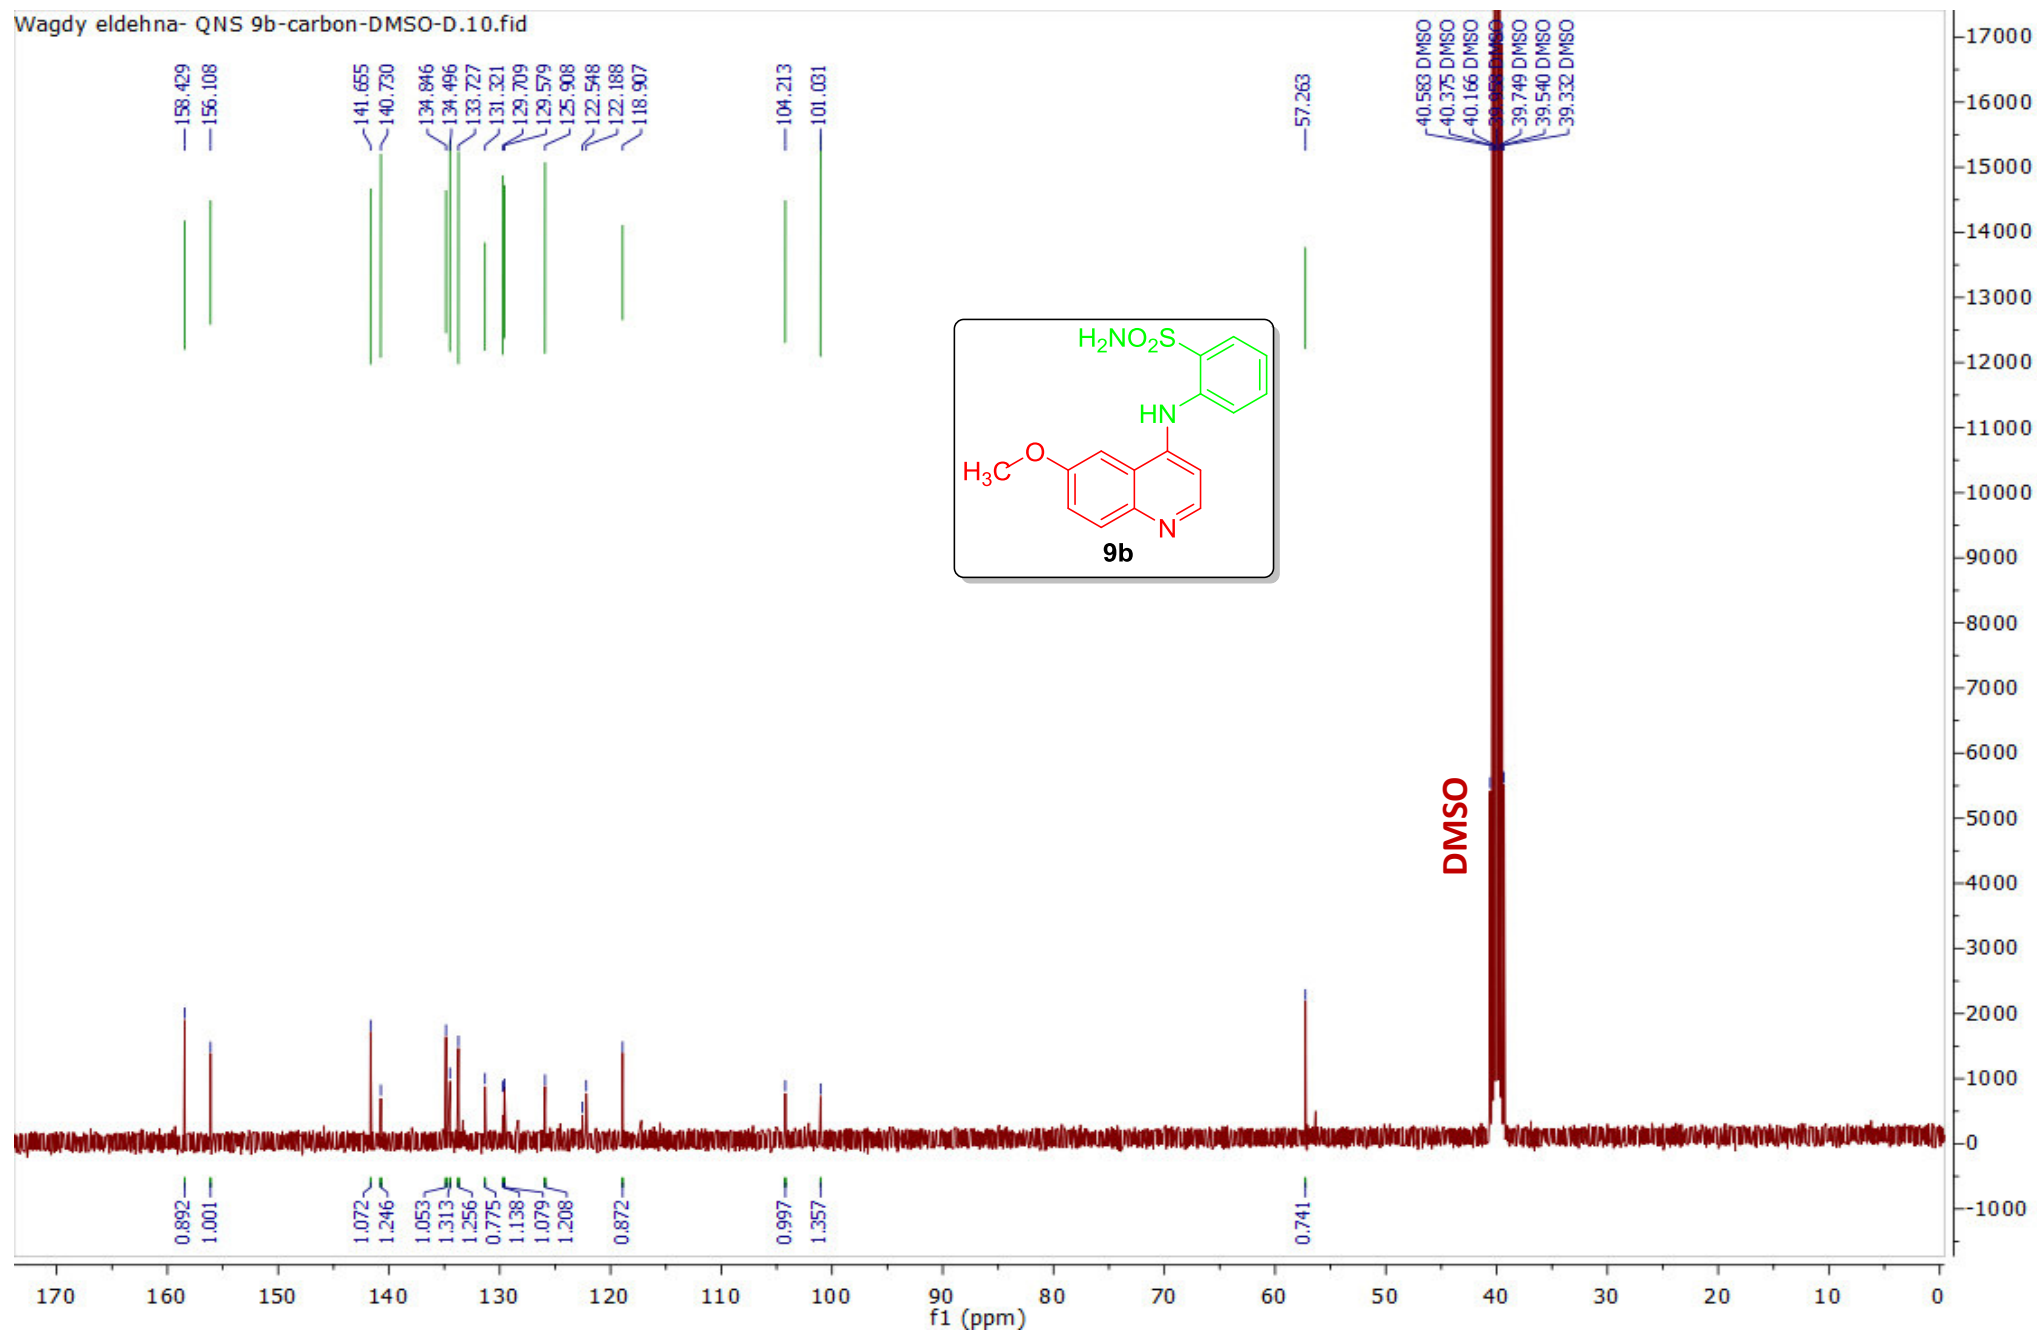

Wagdy Eldahna-QNS-9c-MS-Proton.10.1.1r

Wagdy Eldahna-QNS-9c-MS-Proton

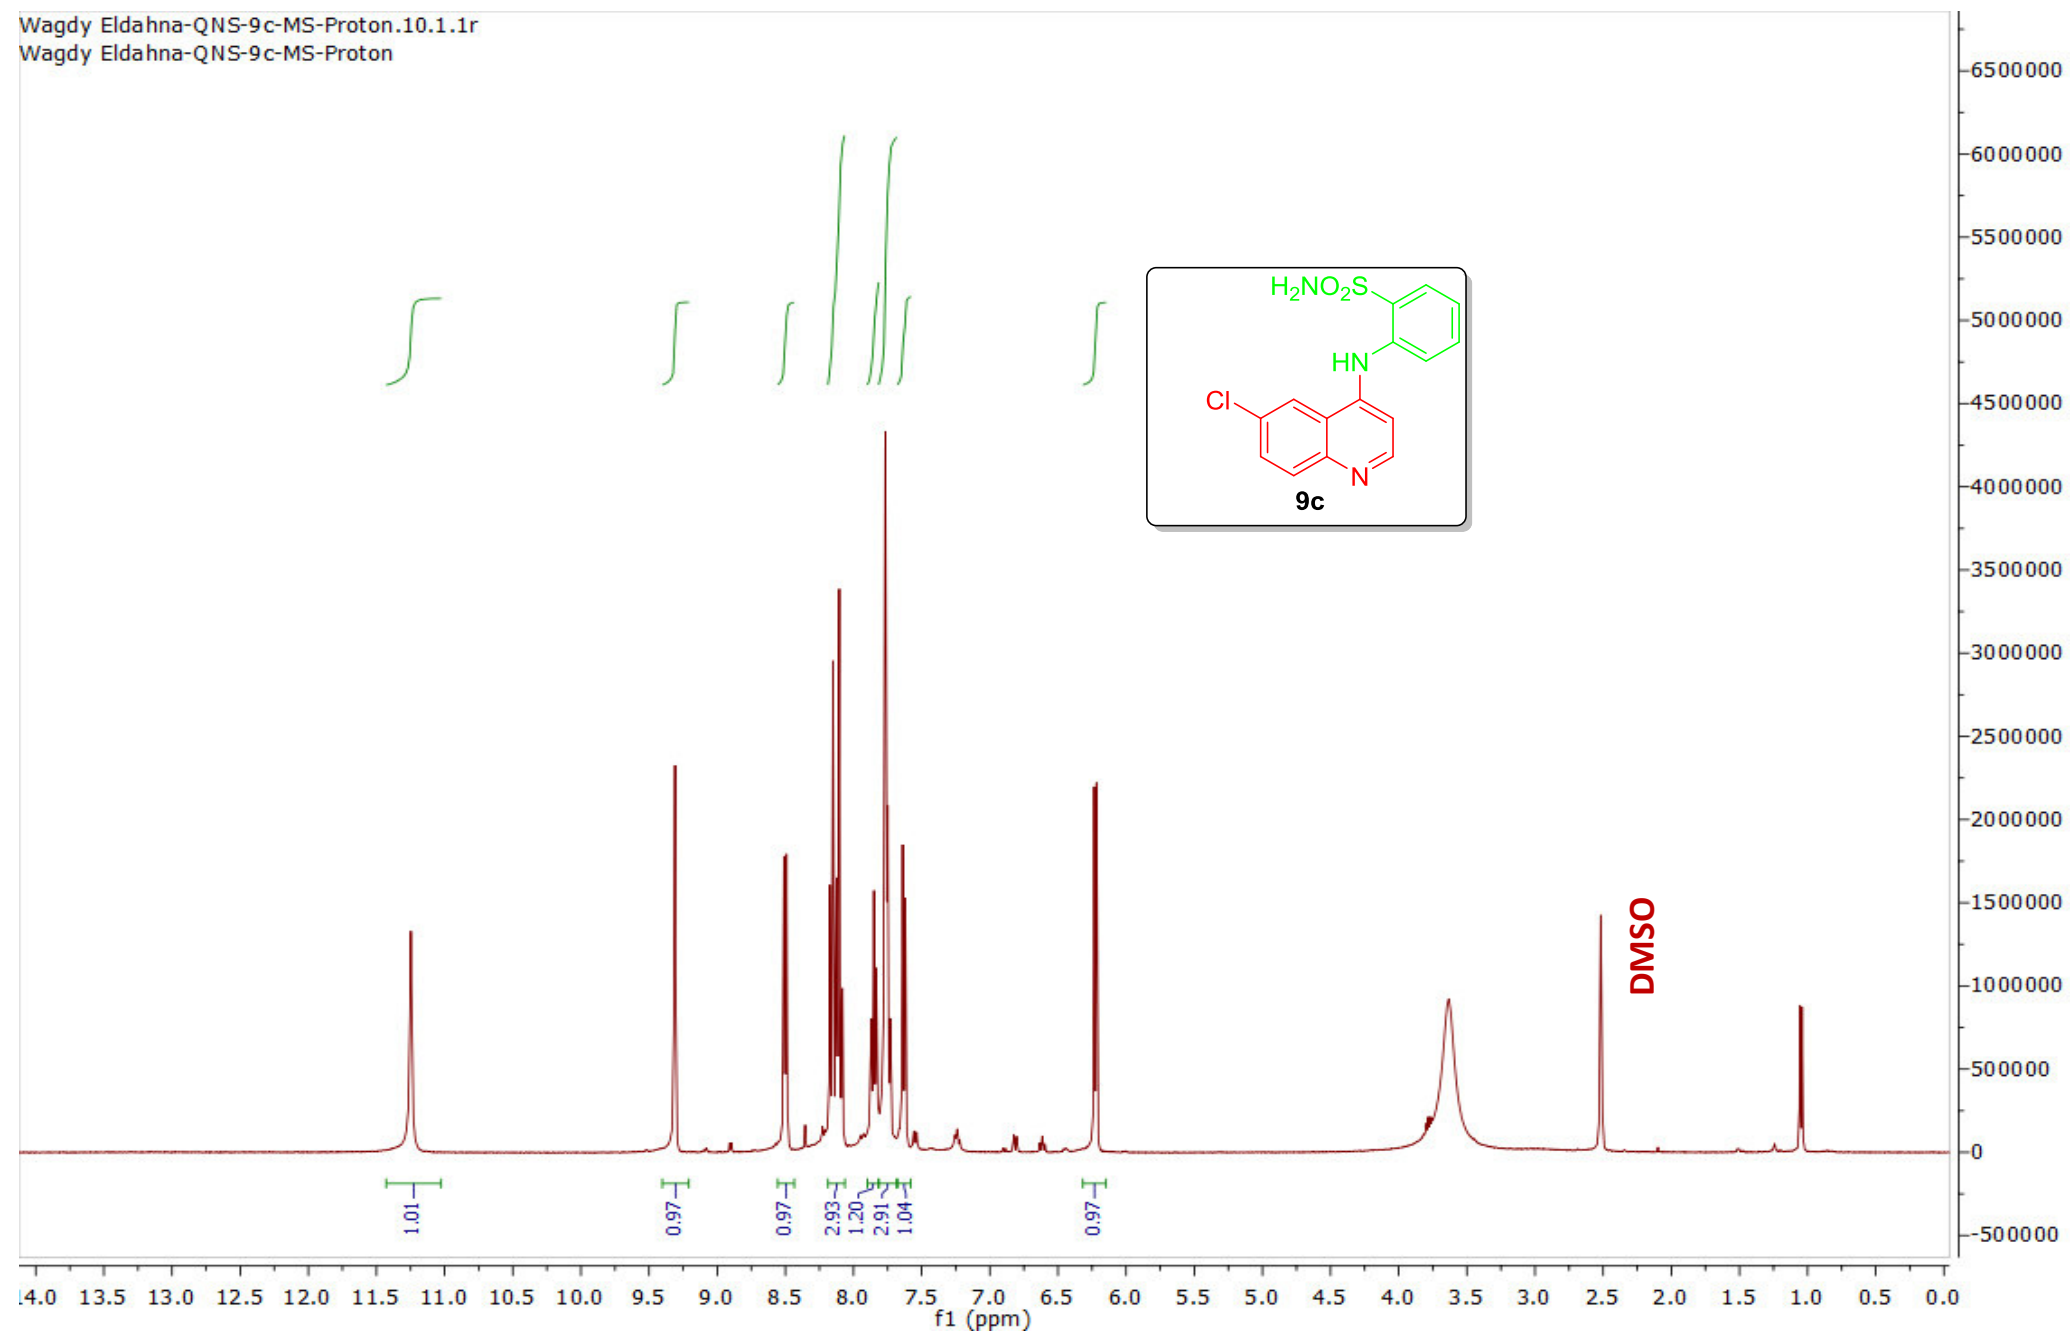

Wagdy eldehna- QNS 9c-carbon-DMSO-D.10.fid

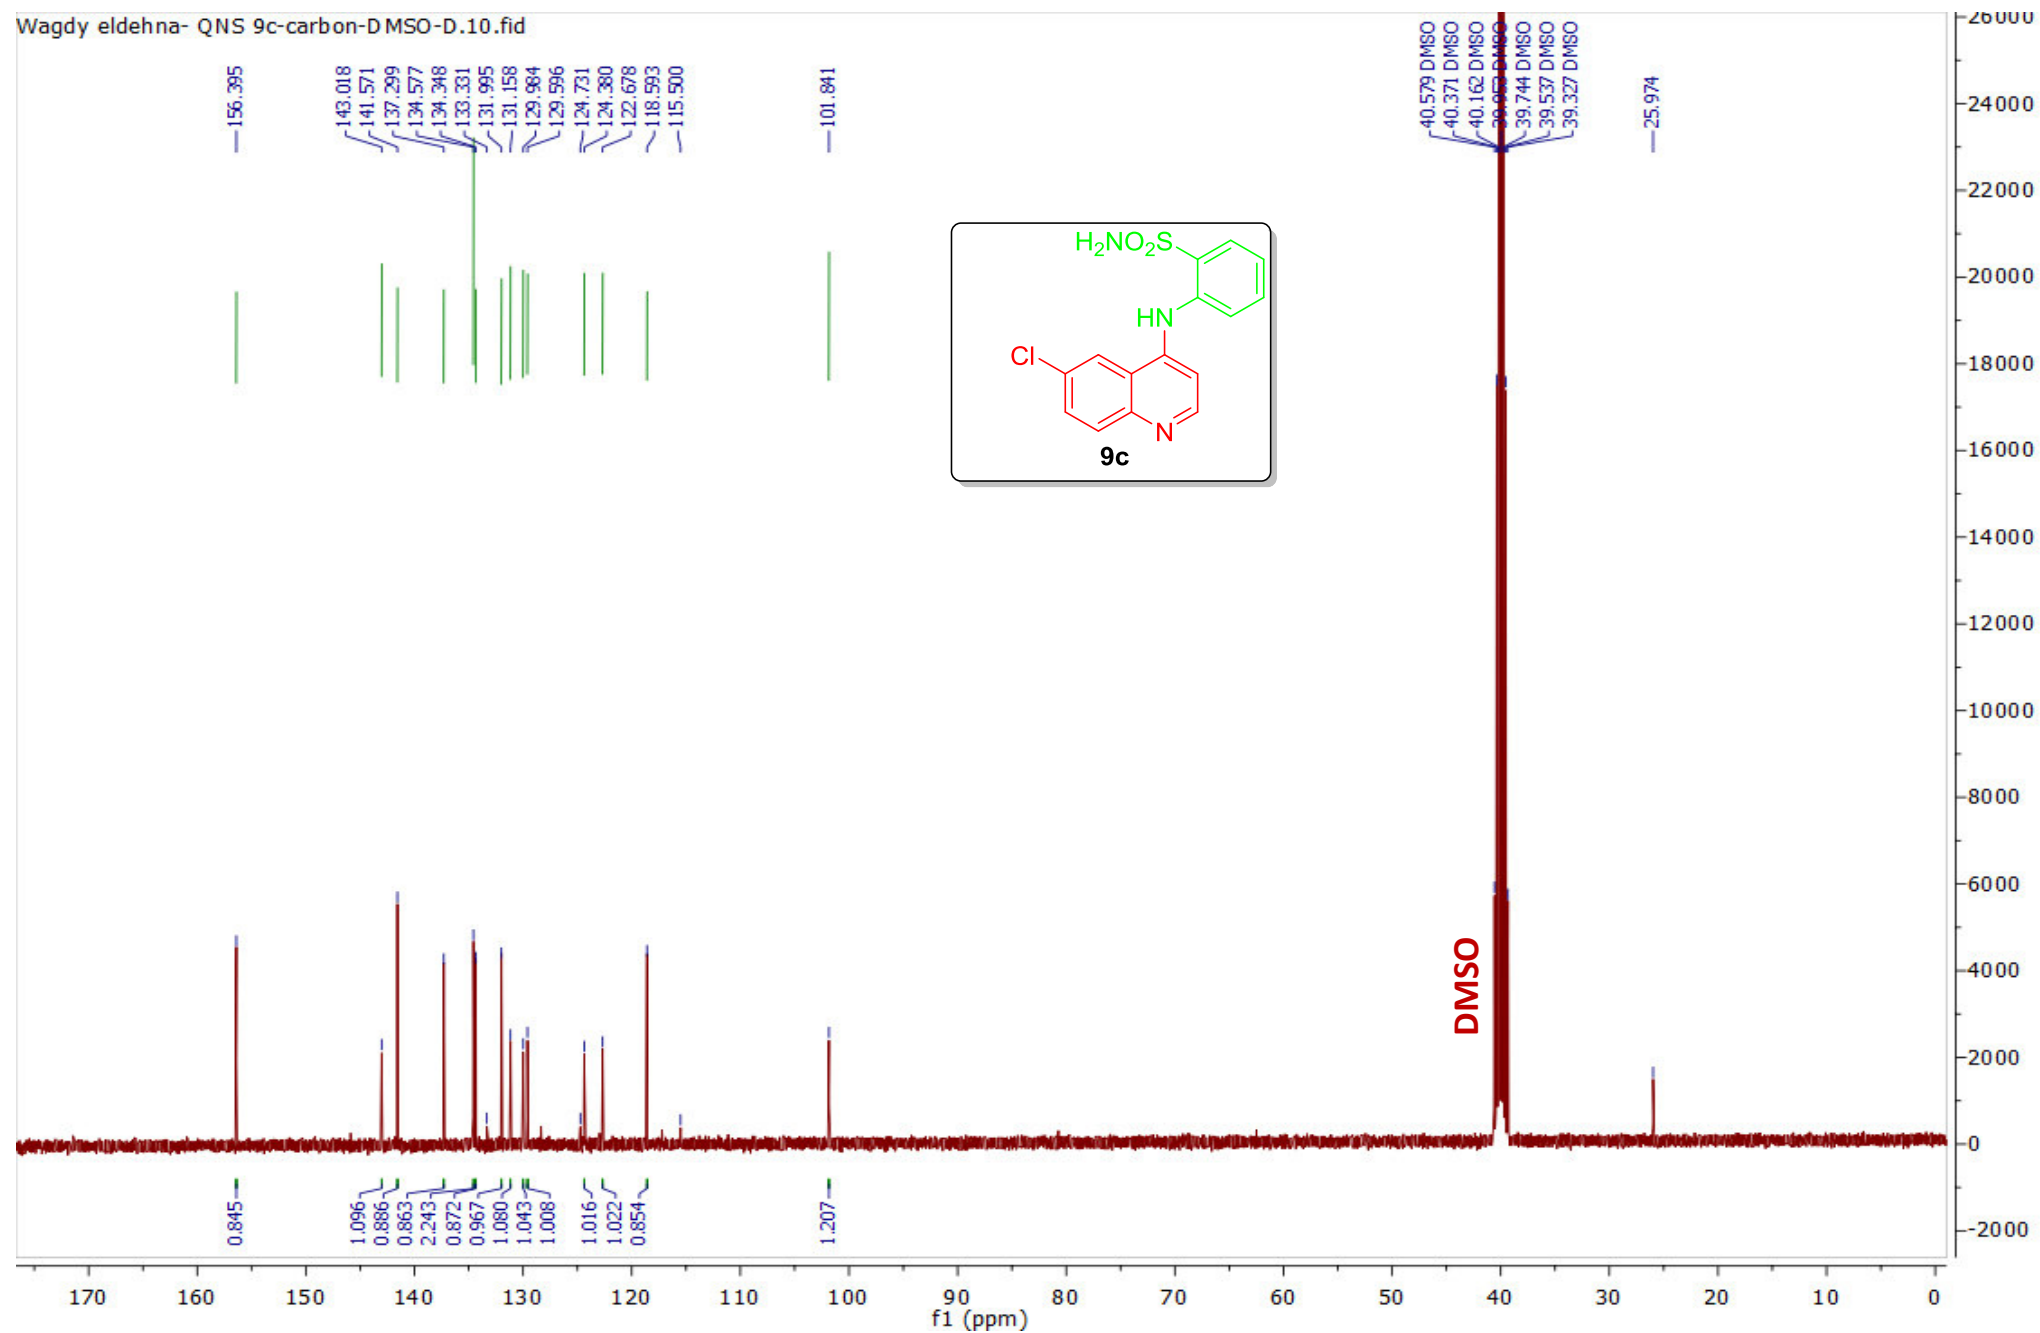

Wagdy Eldahna-QNS-9c-MS-Proton.10.1.1r

Wagdy Eldahna-QNS-9c-MS-Proton

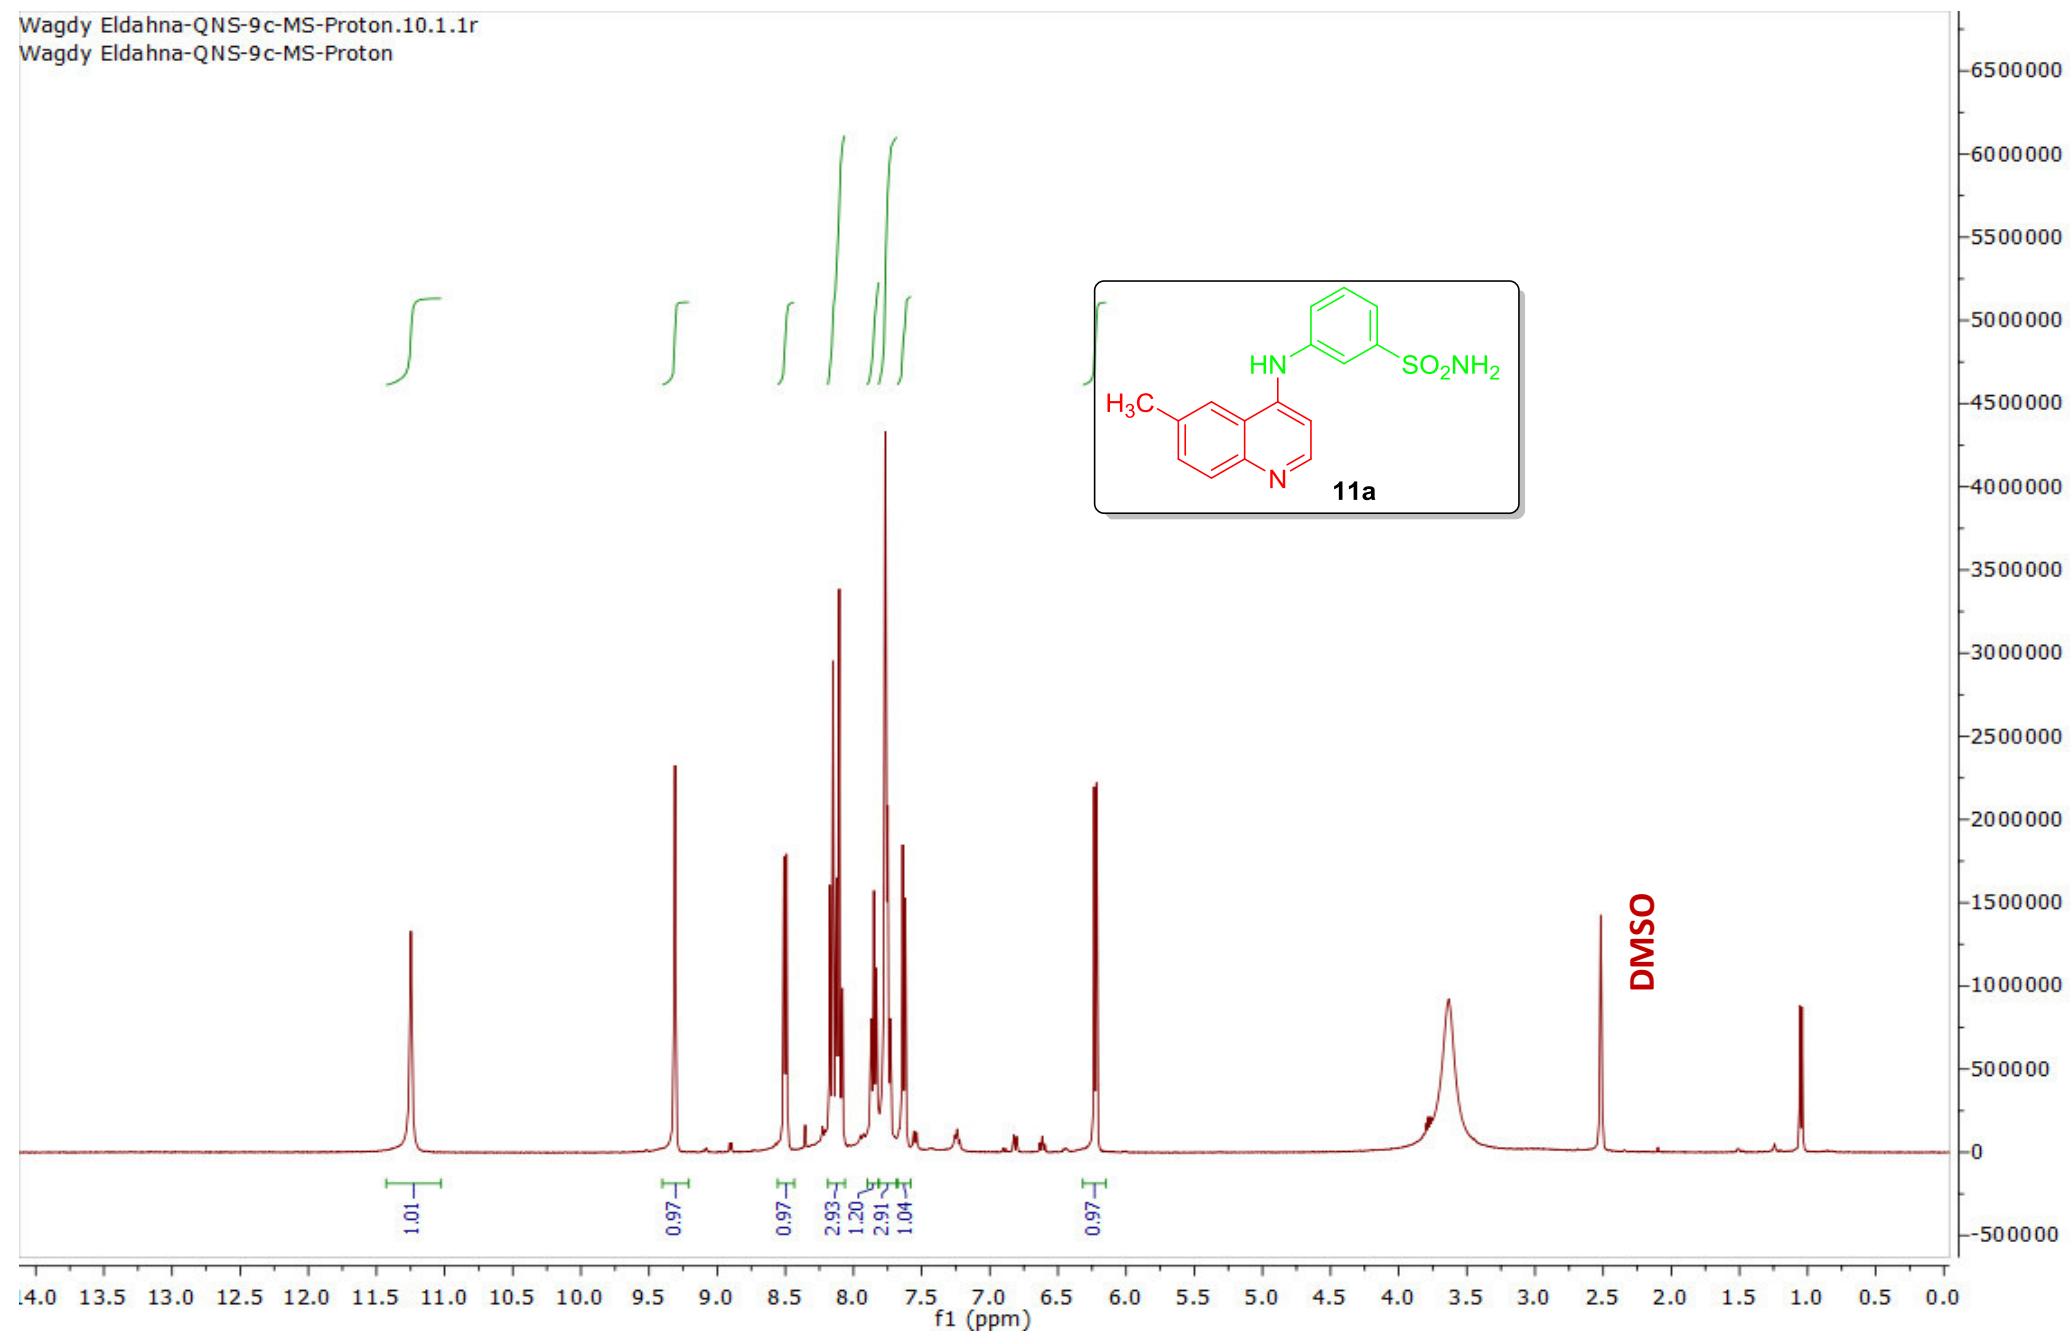

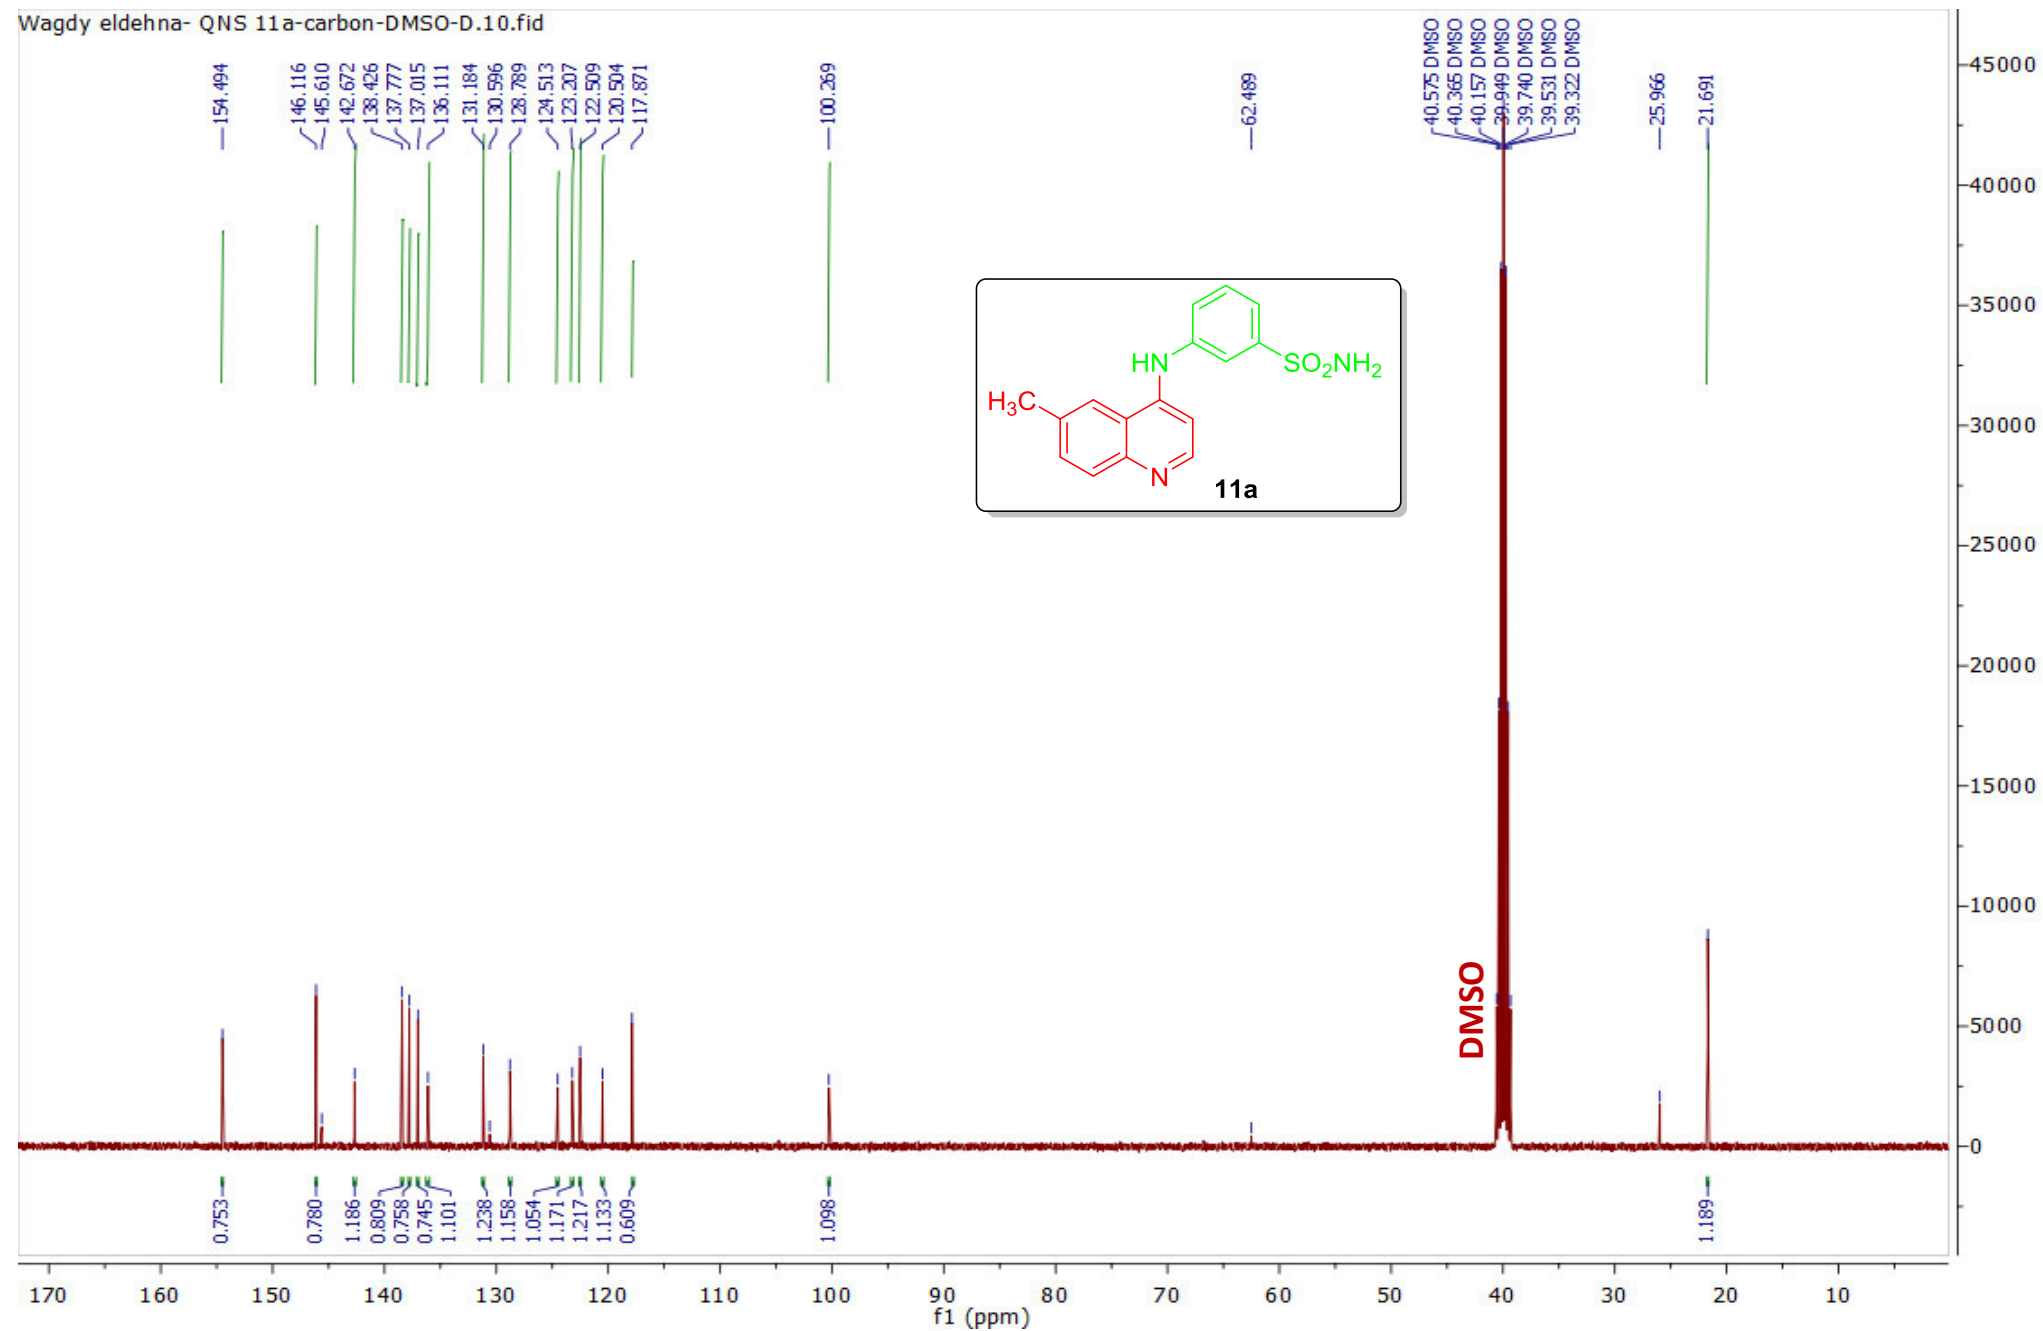



Wagdy Eldahna-QNS-11b-MS-Proton.10.1.1r  
Wagdy Eldahna-QNS-11b-MS-Proton

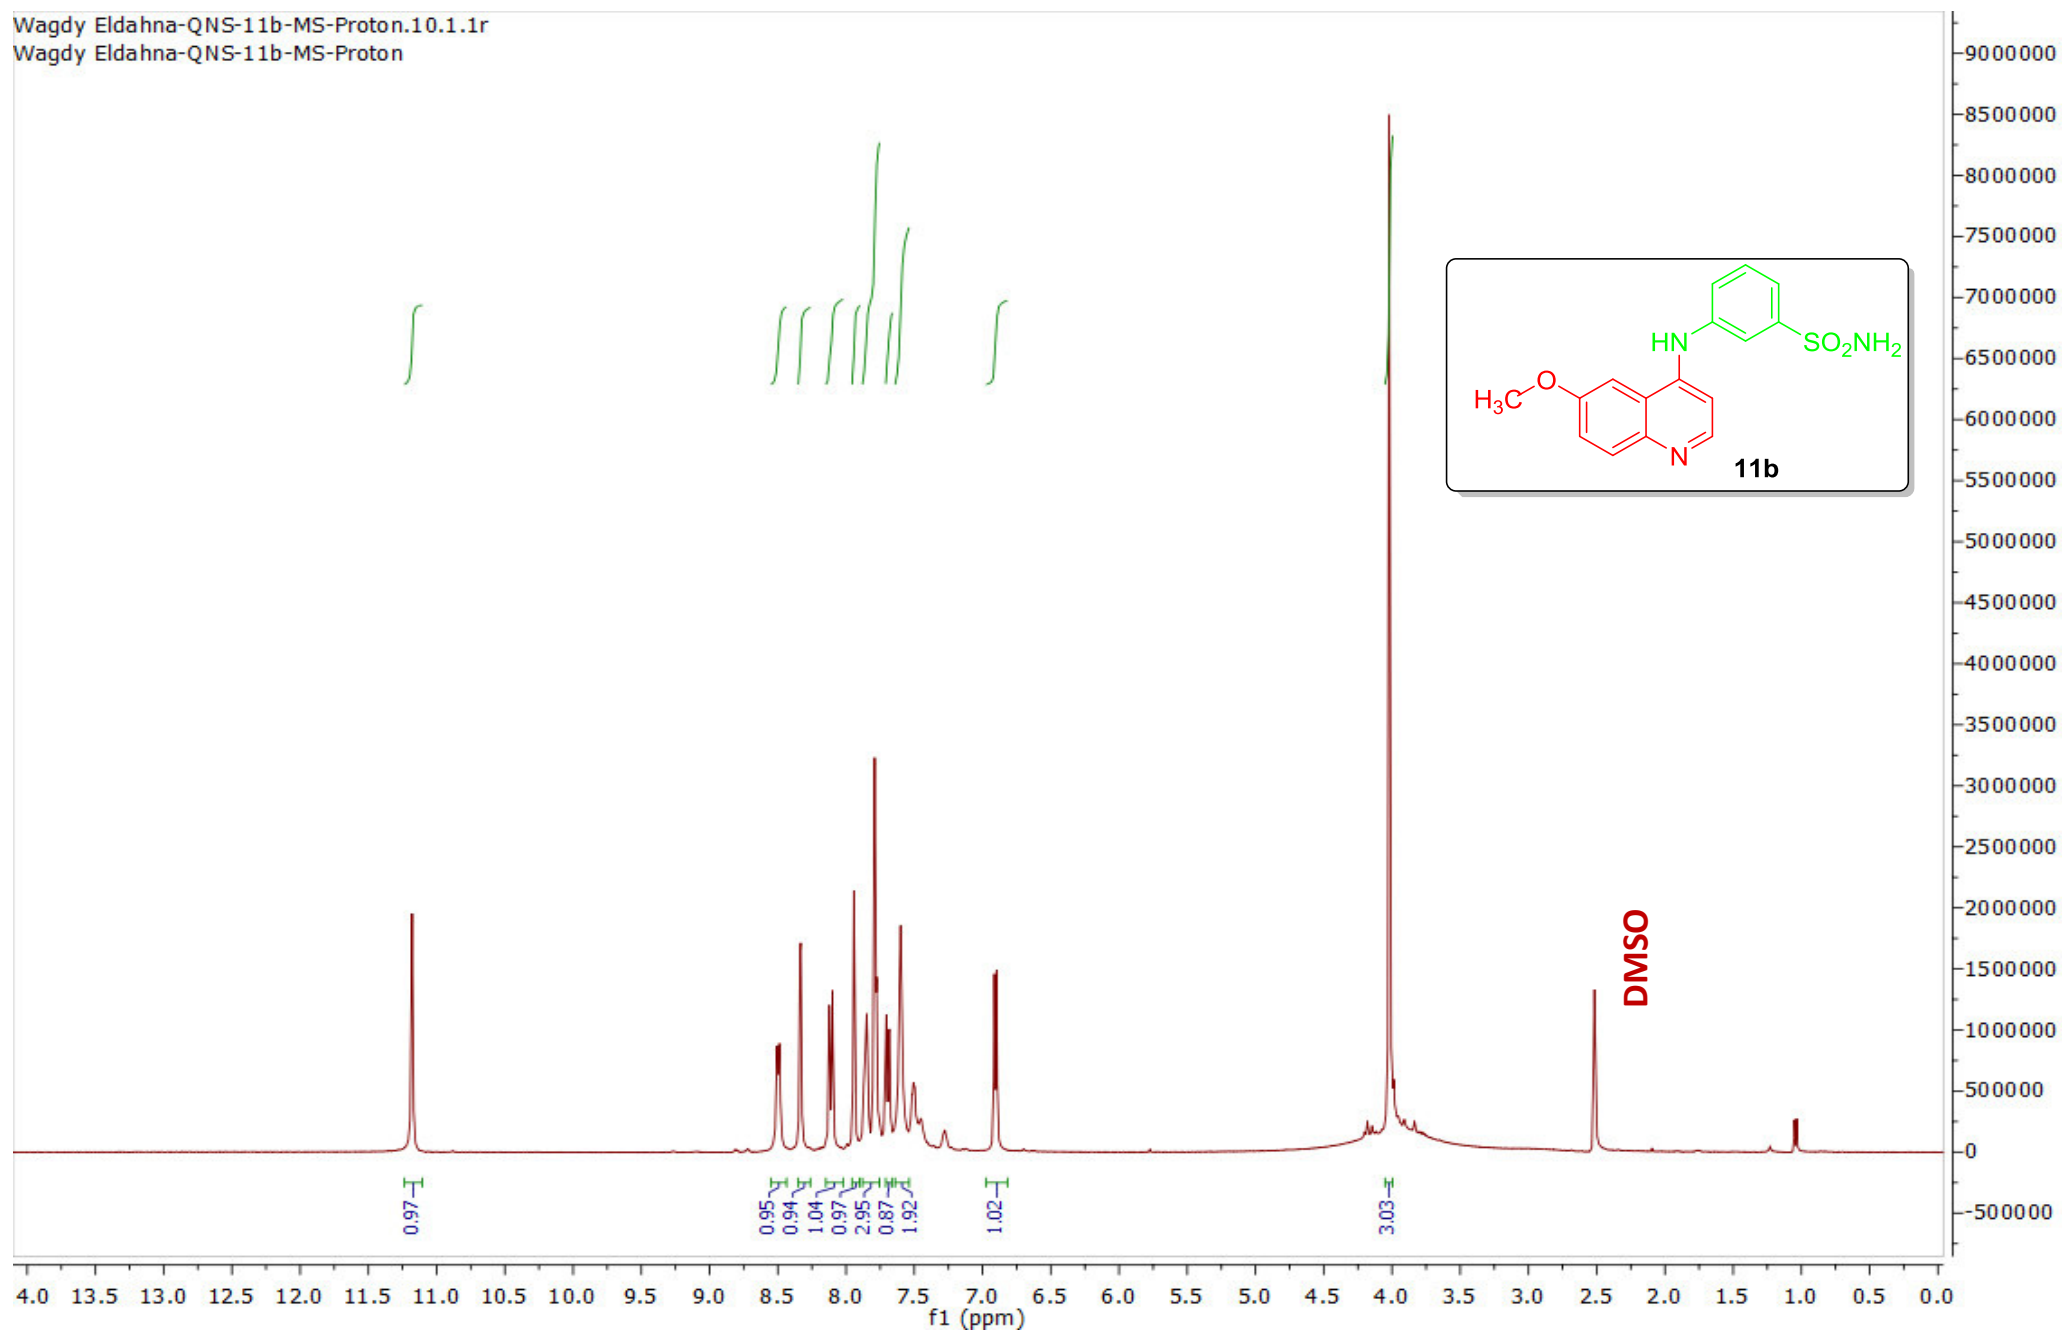

Wagdy eldehna- QNS 11b-carbon-DMSO-D.10.fid

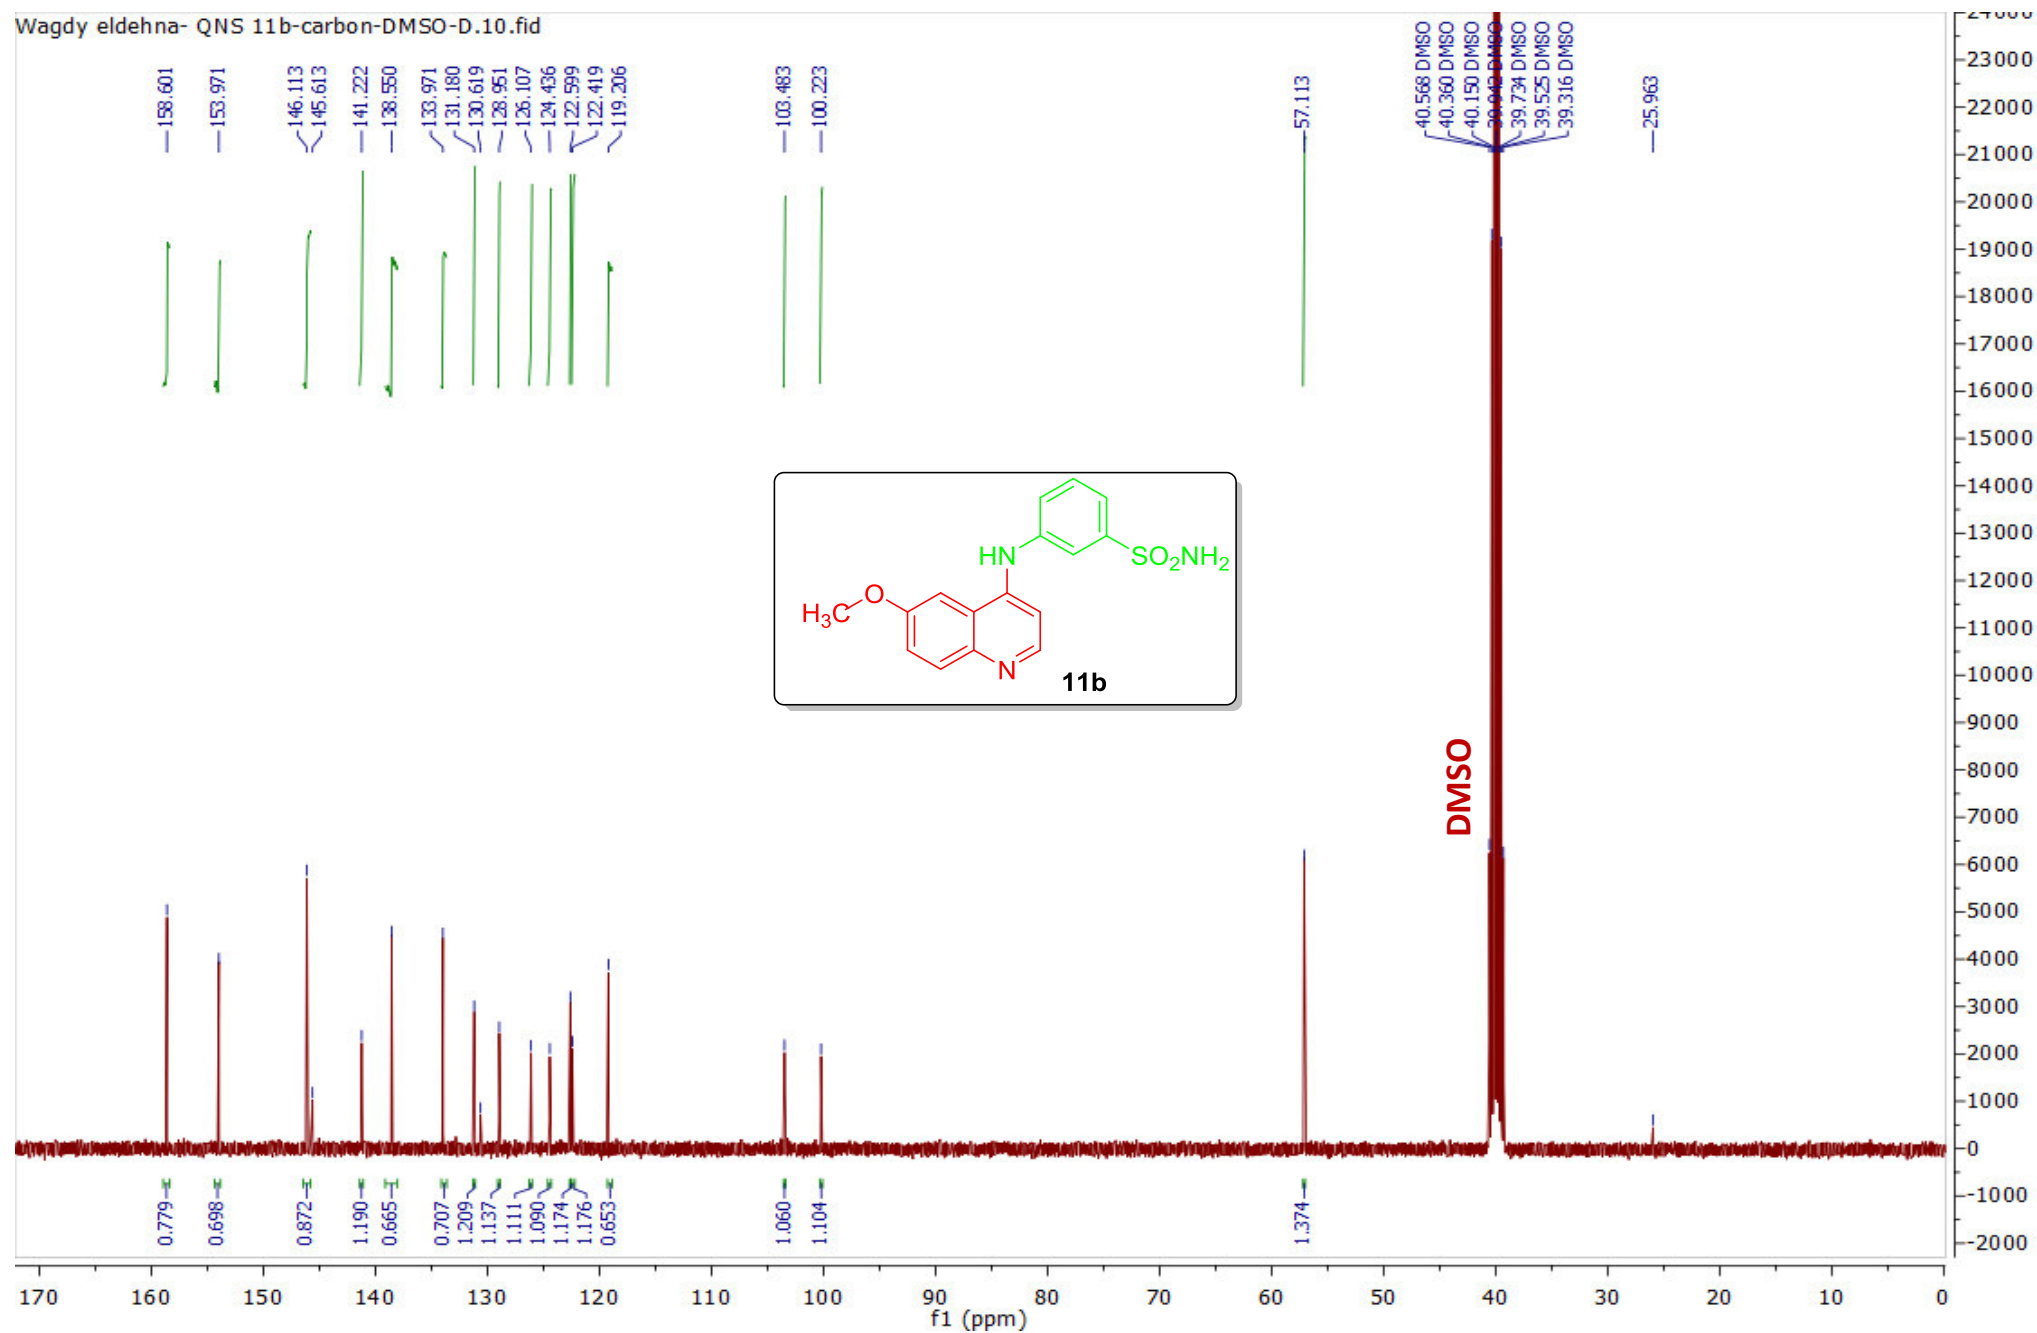

Wagdy Eldahna-QNS-11c-MS-Proton.10.1.1r  
Wagdy Eldahna-QNS-11c-MS-Proton

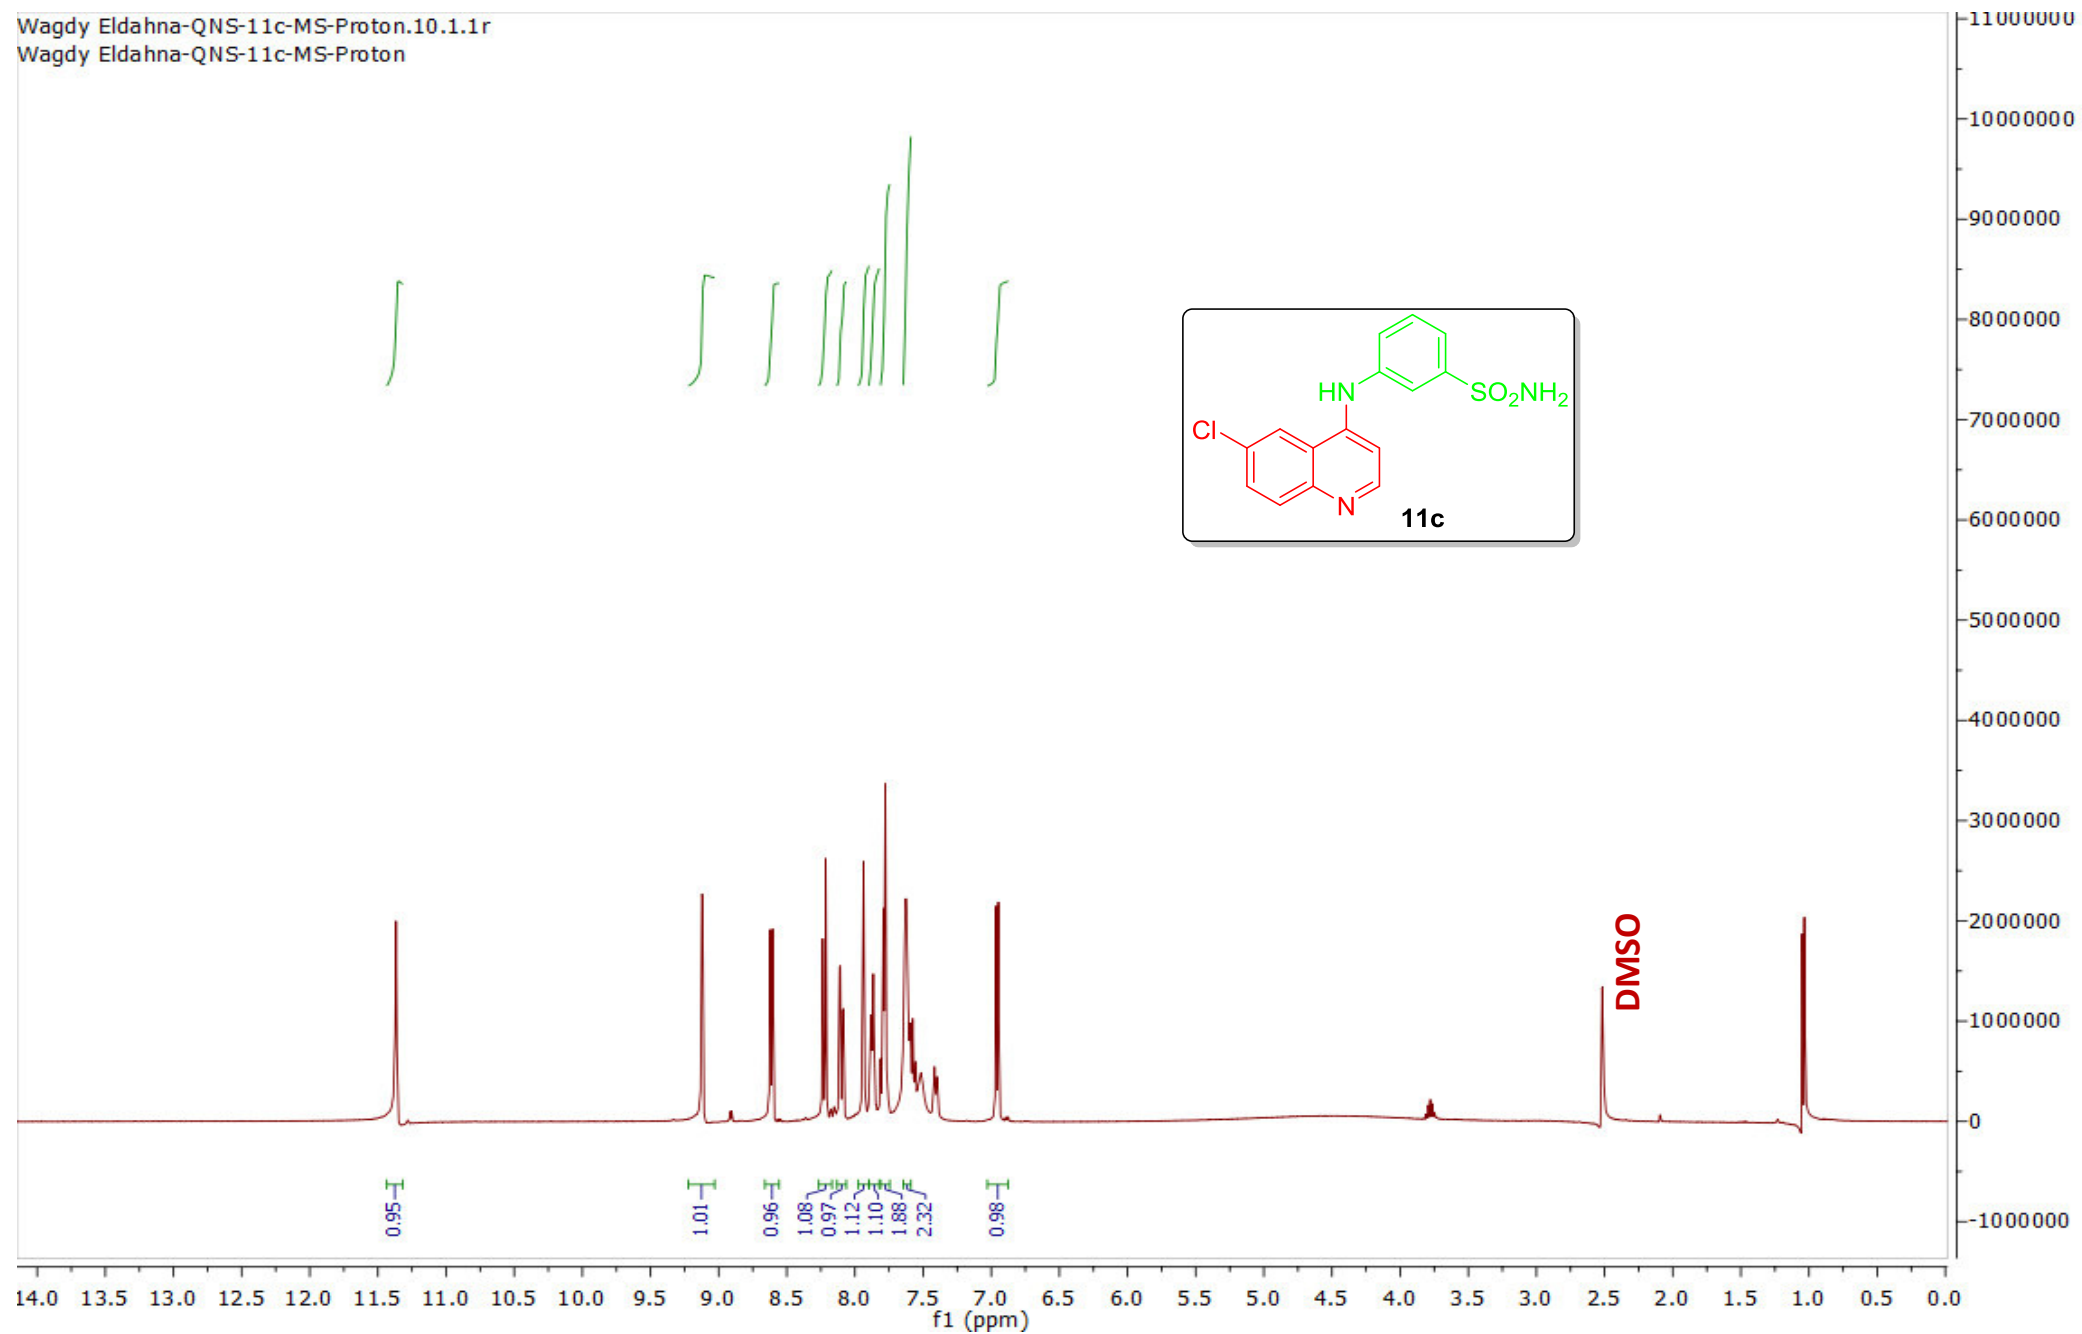

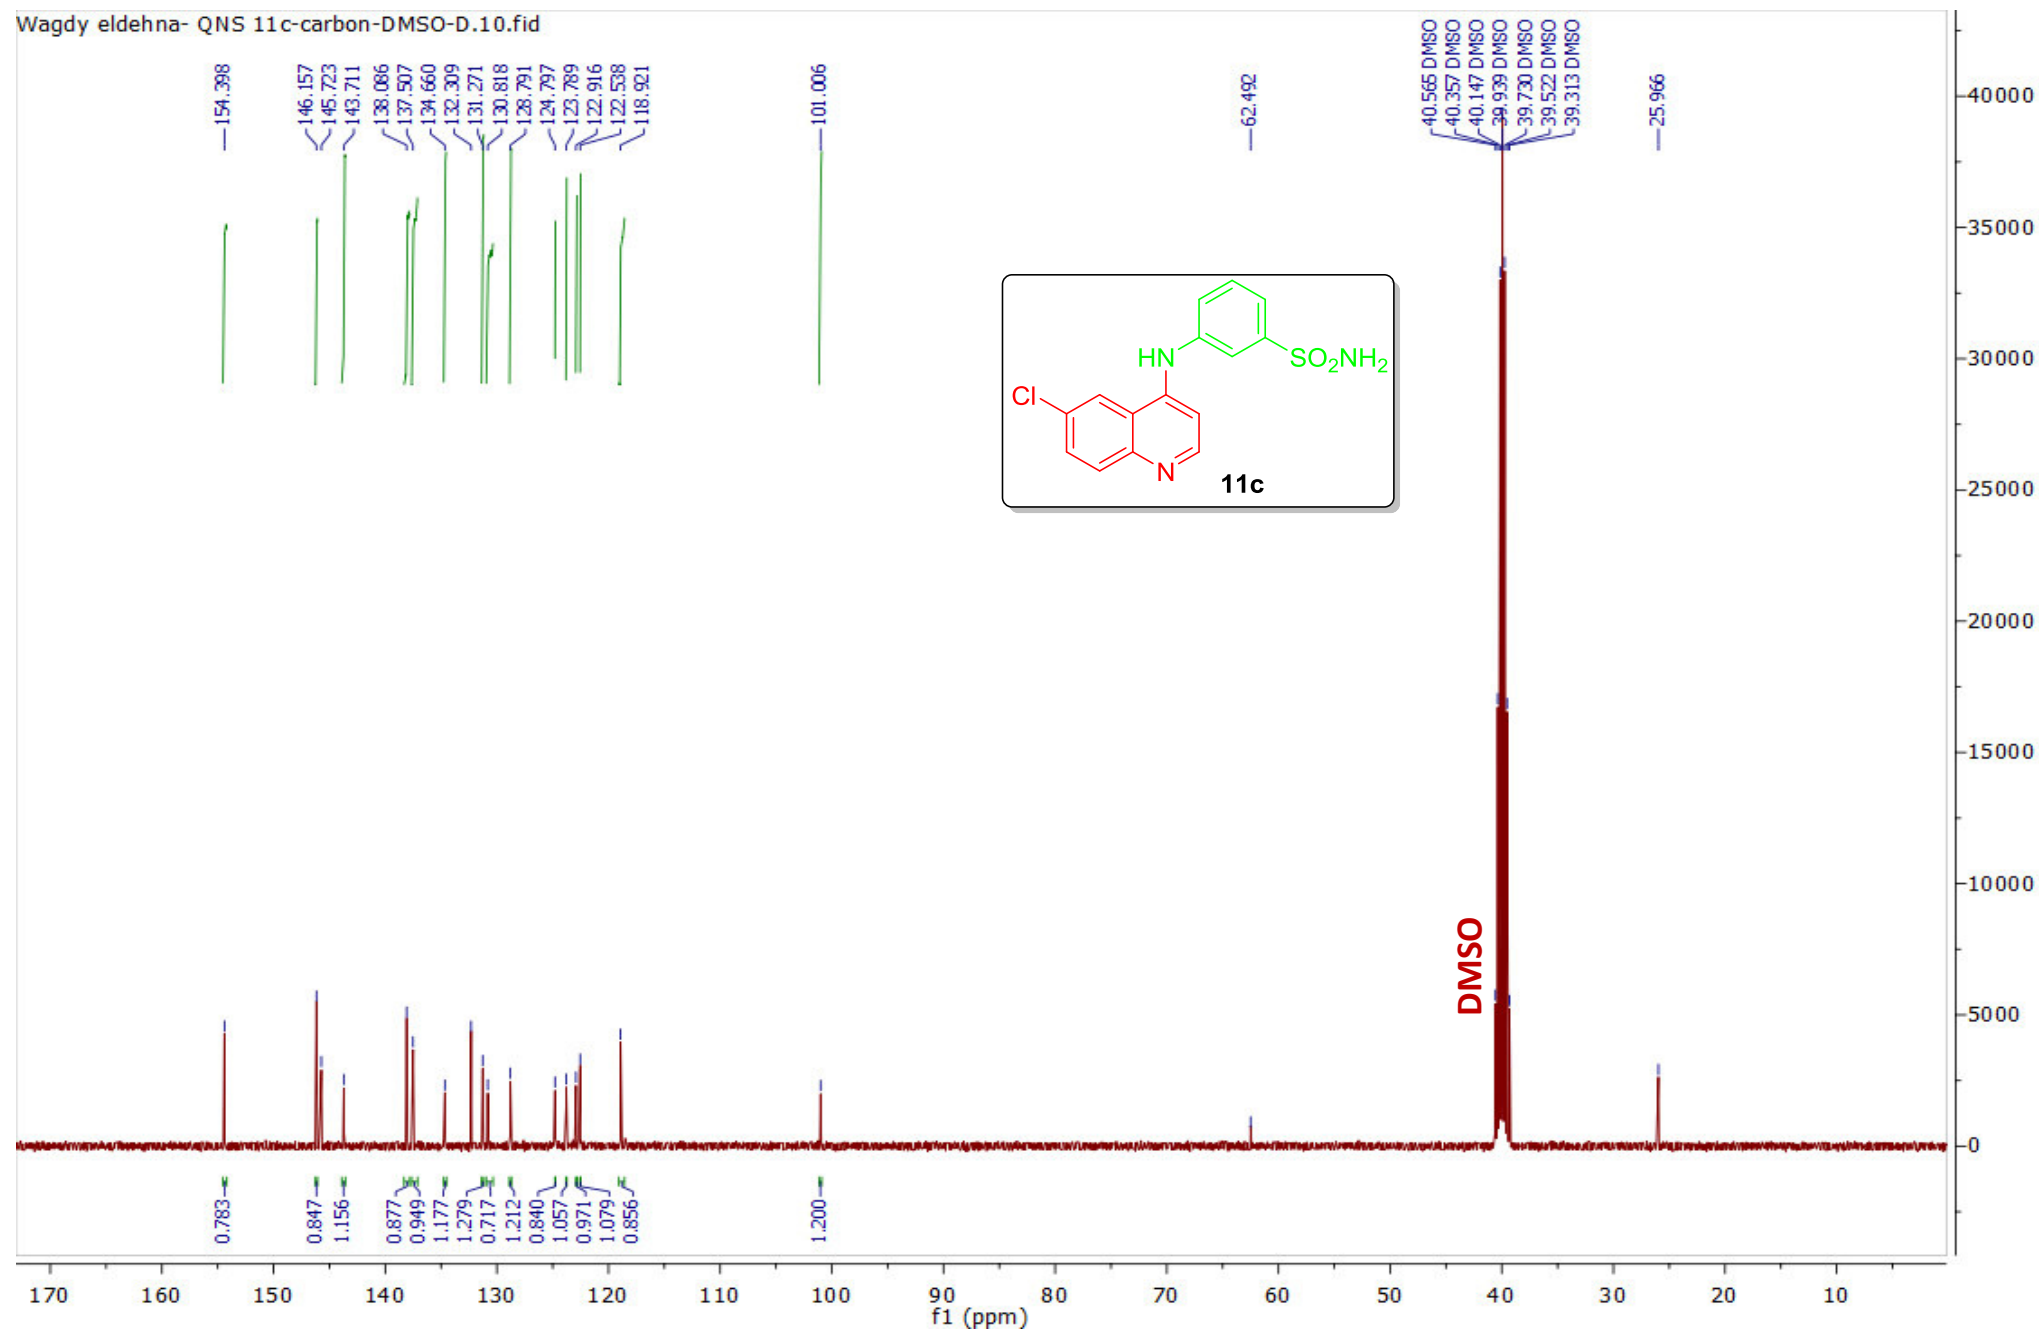

Wagdy Eldahna-QNS-11e-MS-Proton.10.1.1r  
Wagdy Eldahna-QNS-11e-MS-Proton

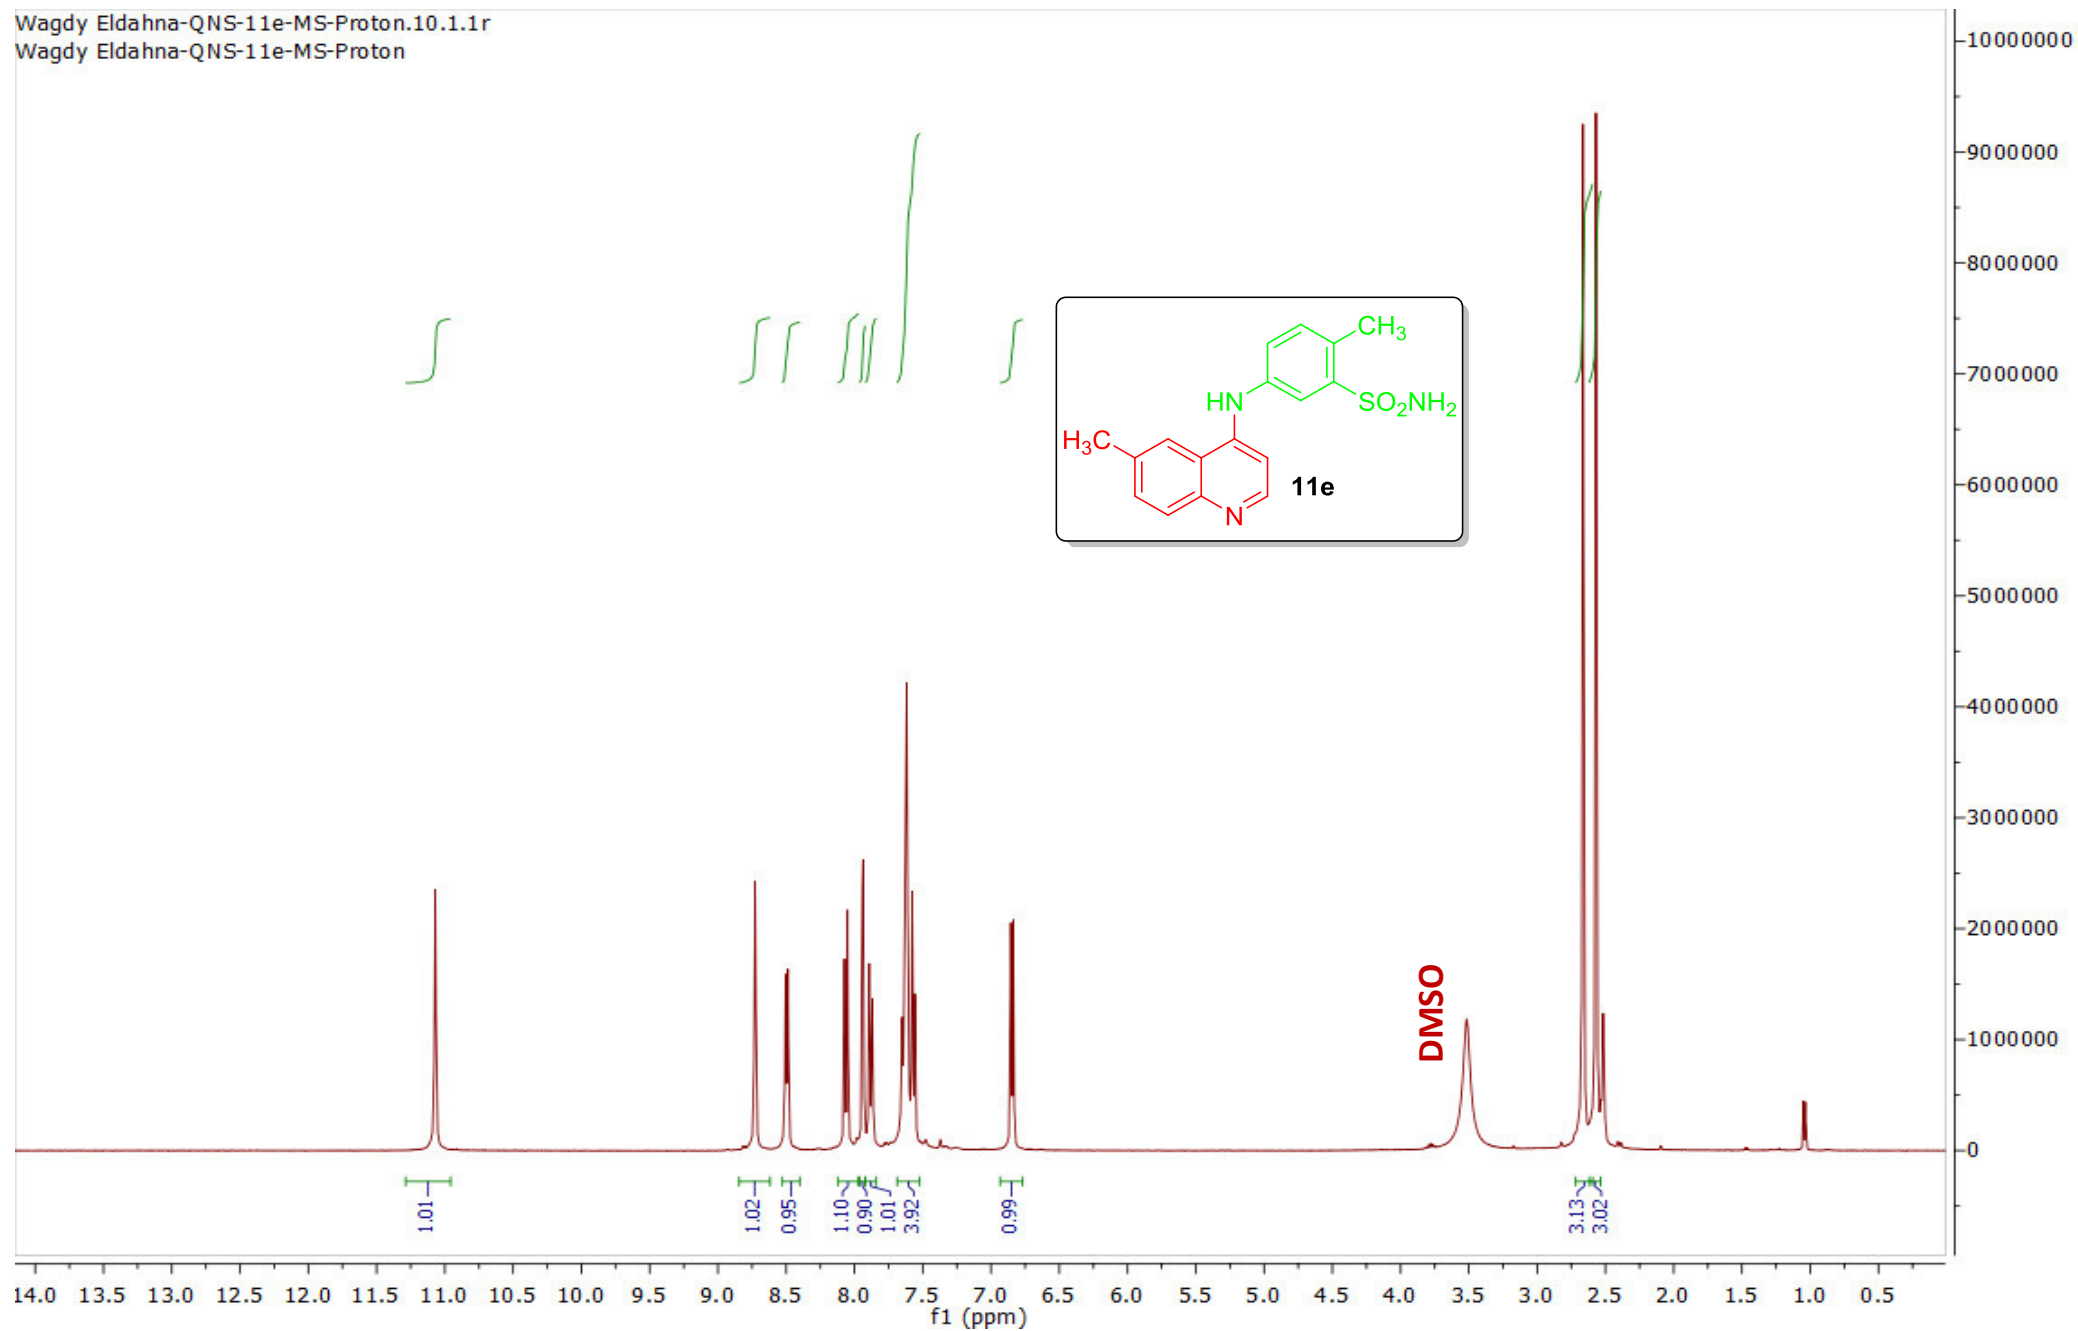

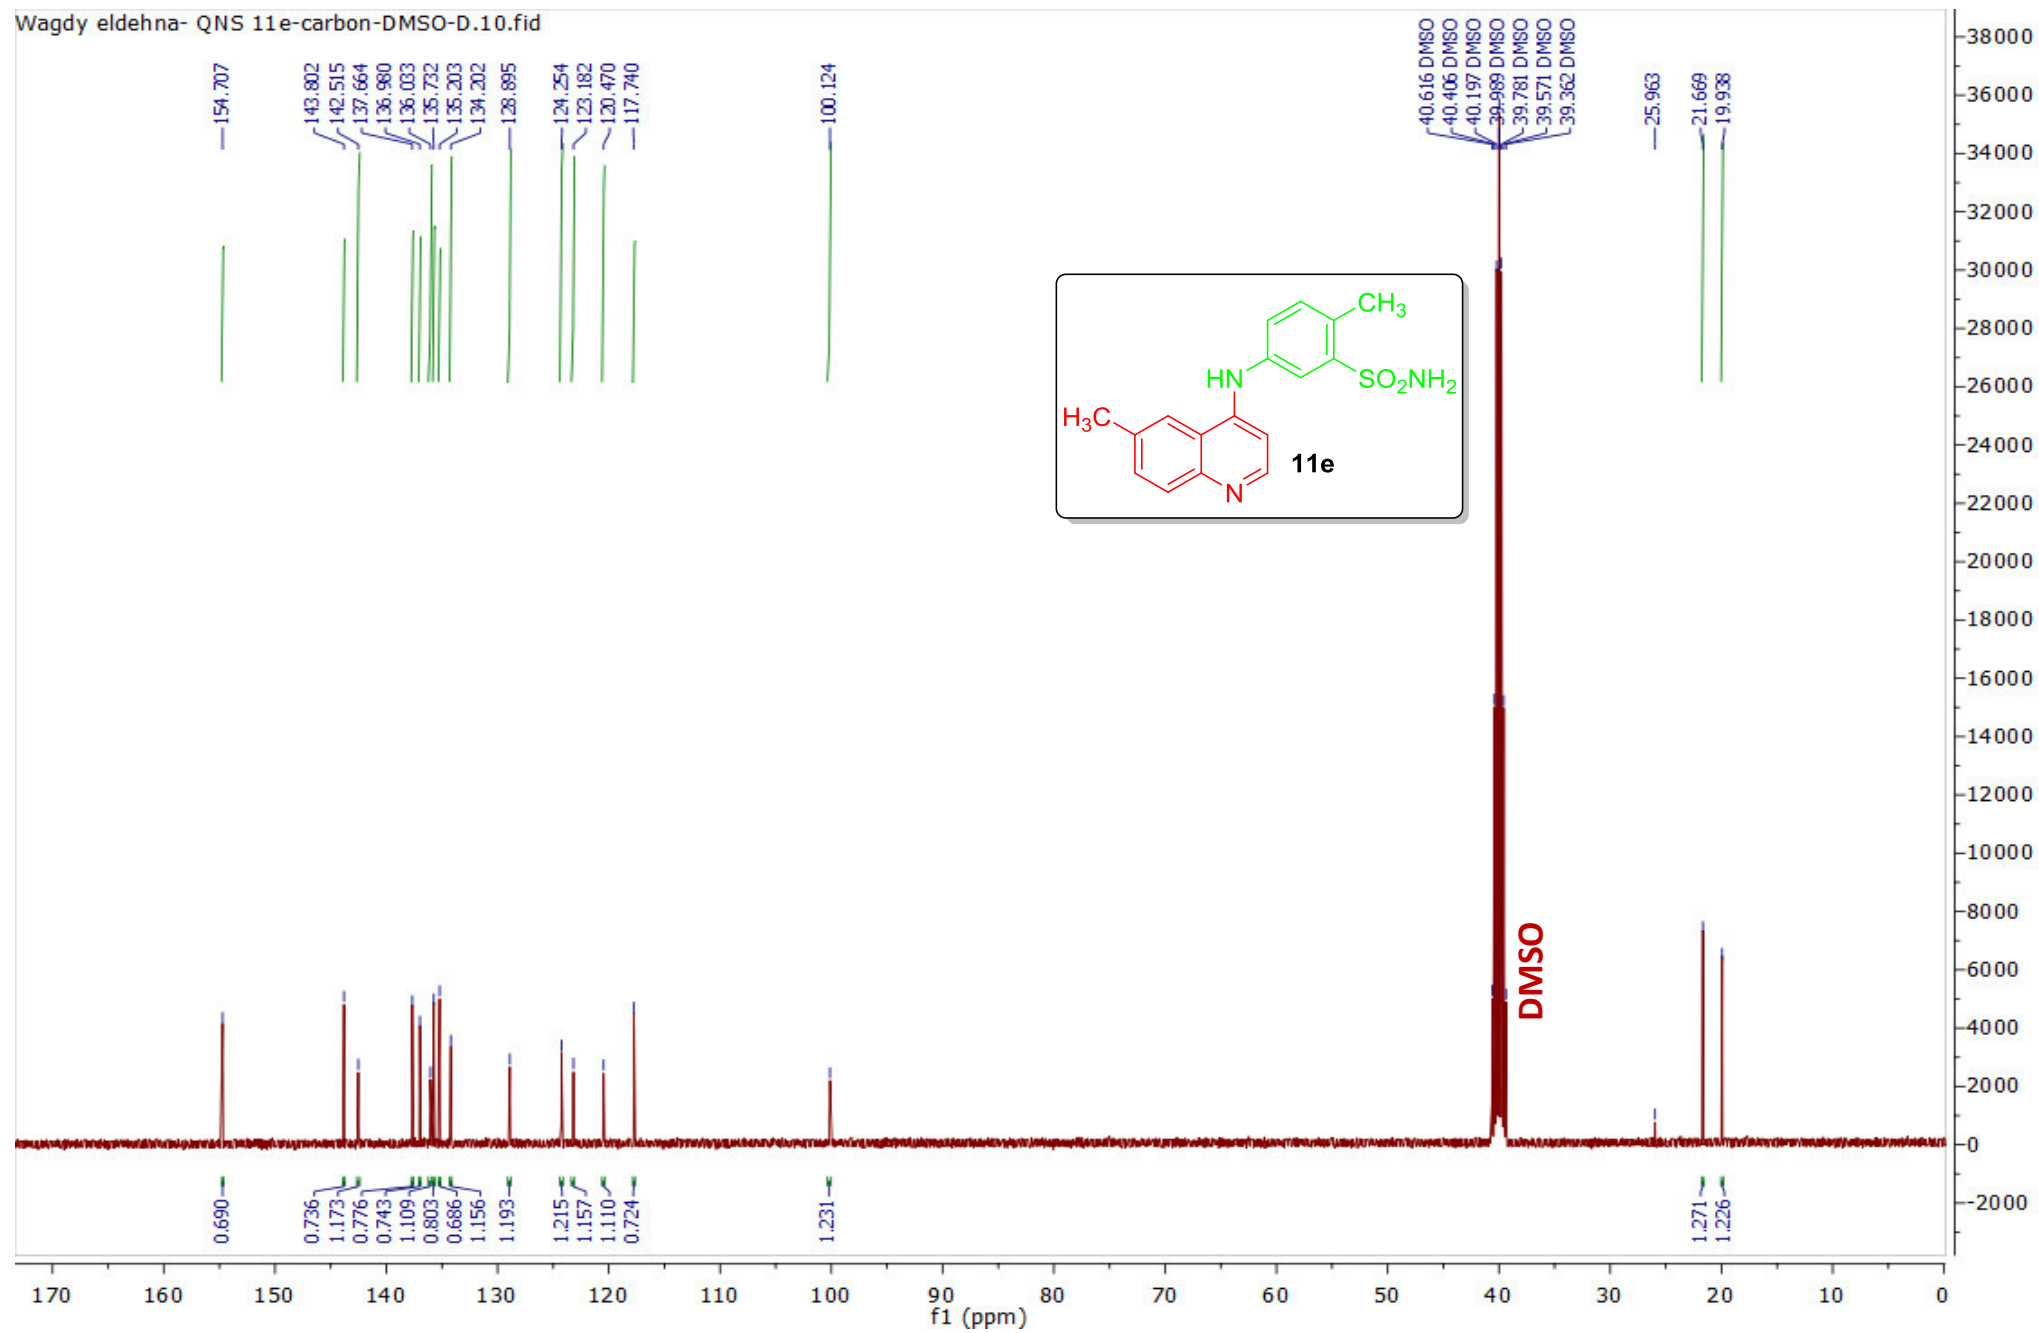

Wagdy Eldahna-QNS-11f-MS-Proton.10.1.1r

Wagdy Eldahna-QNS-11f-MS-Proton

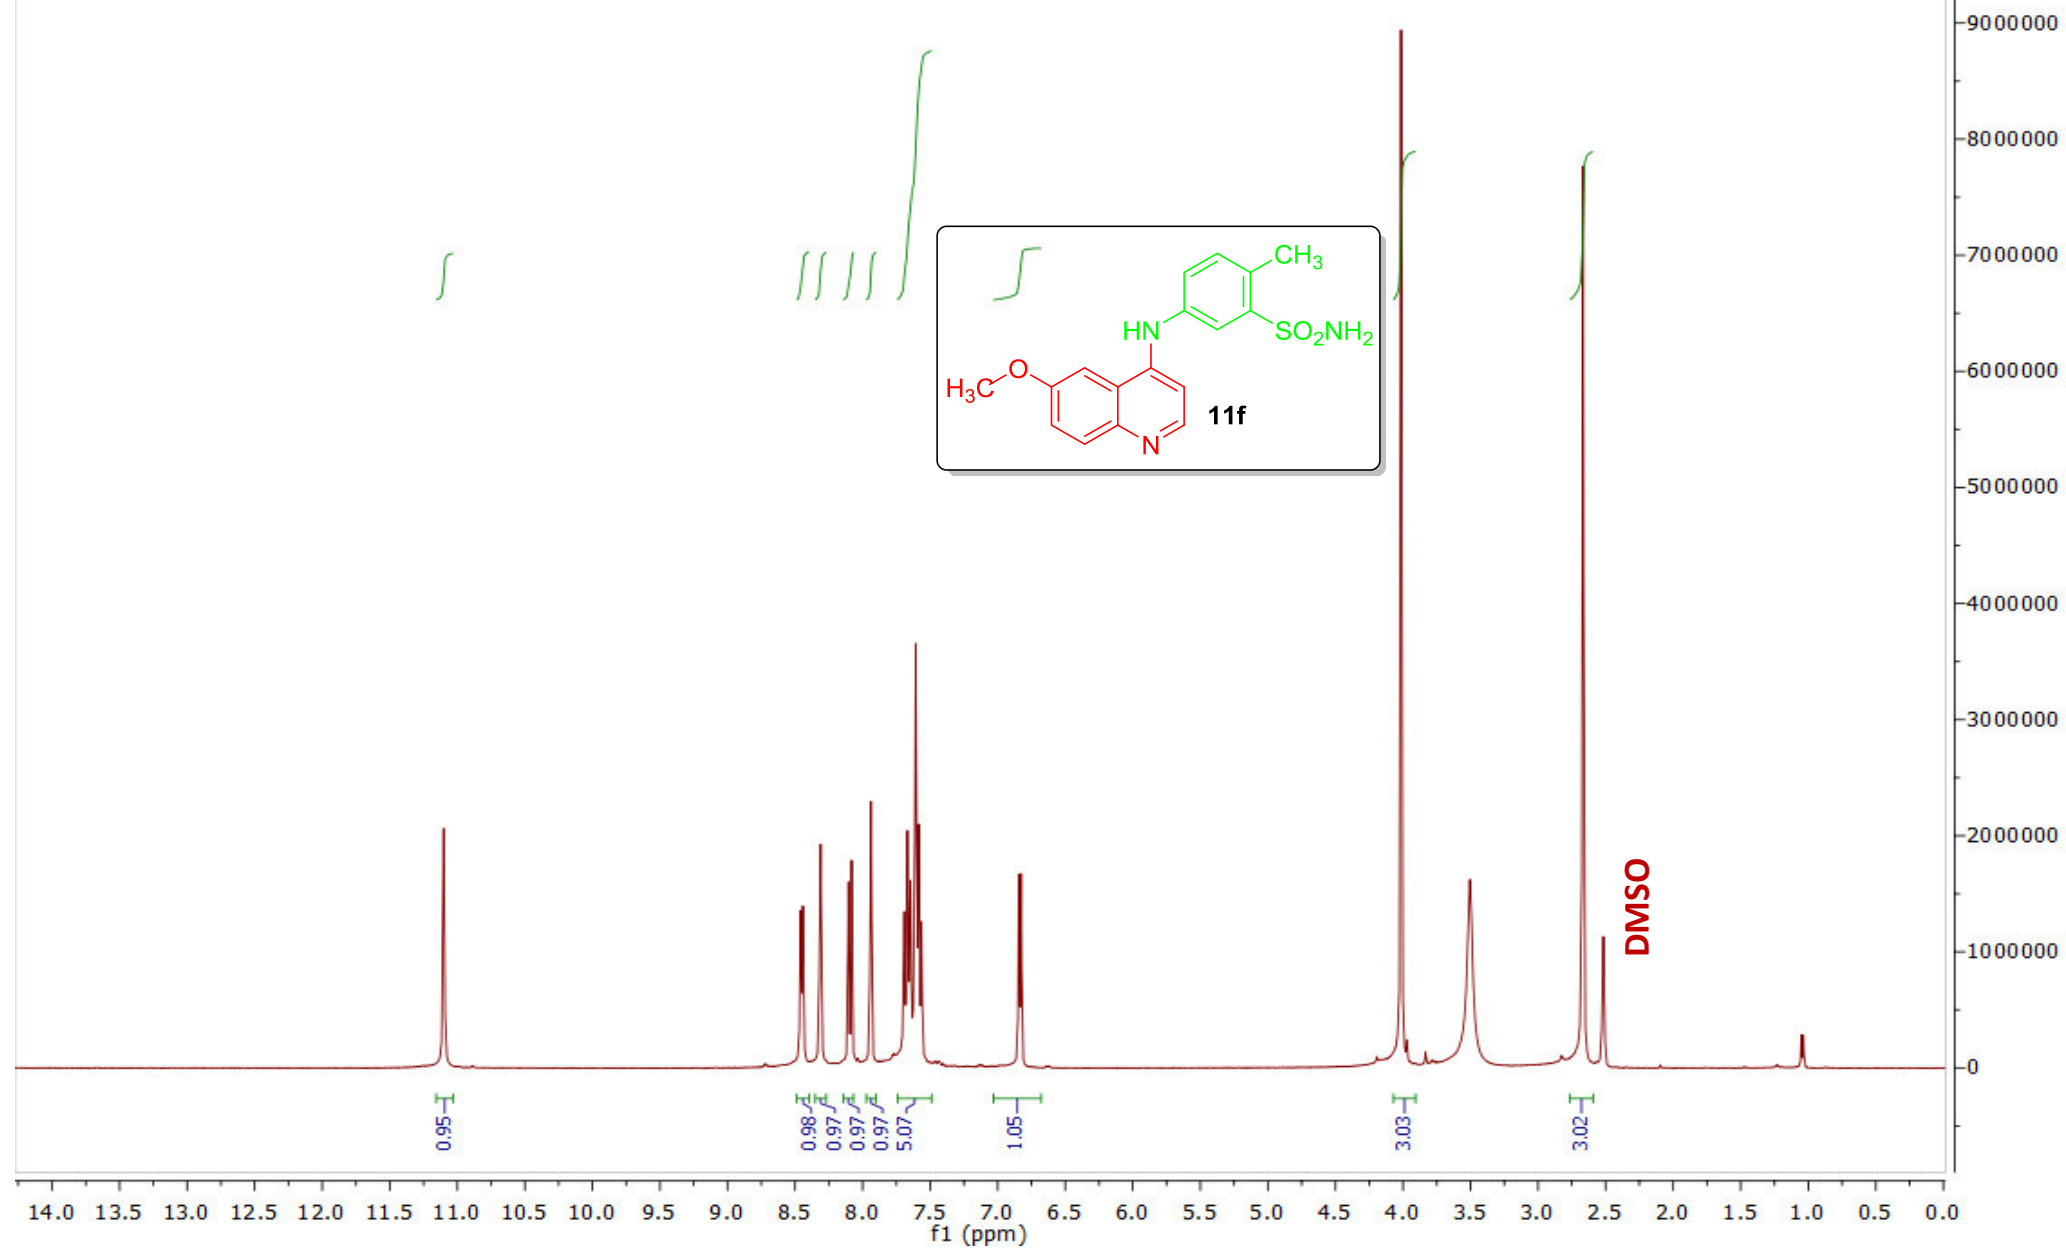

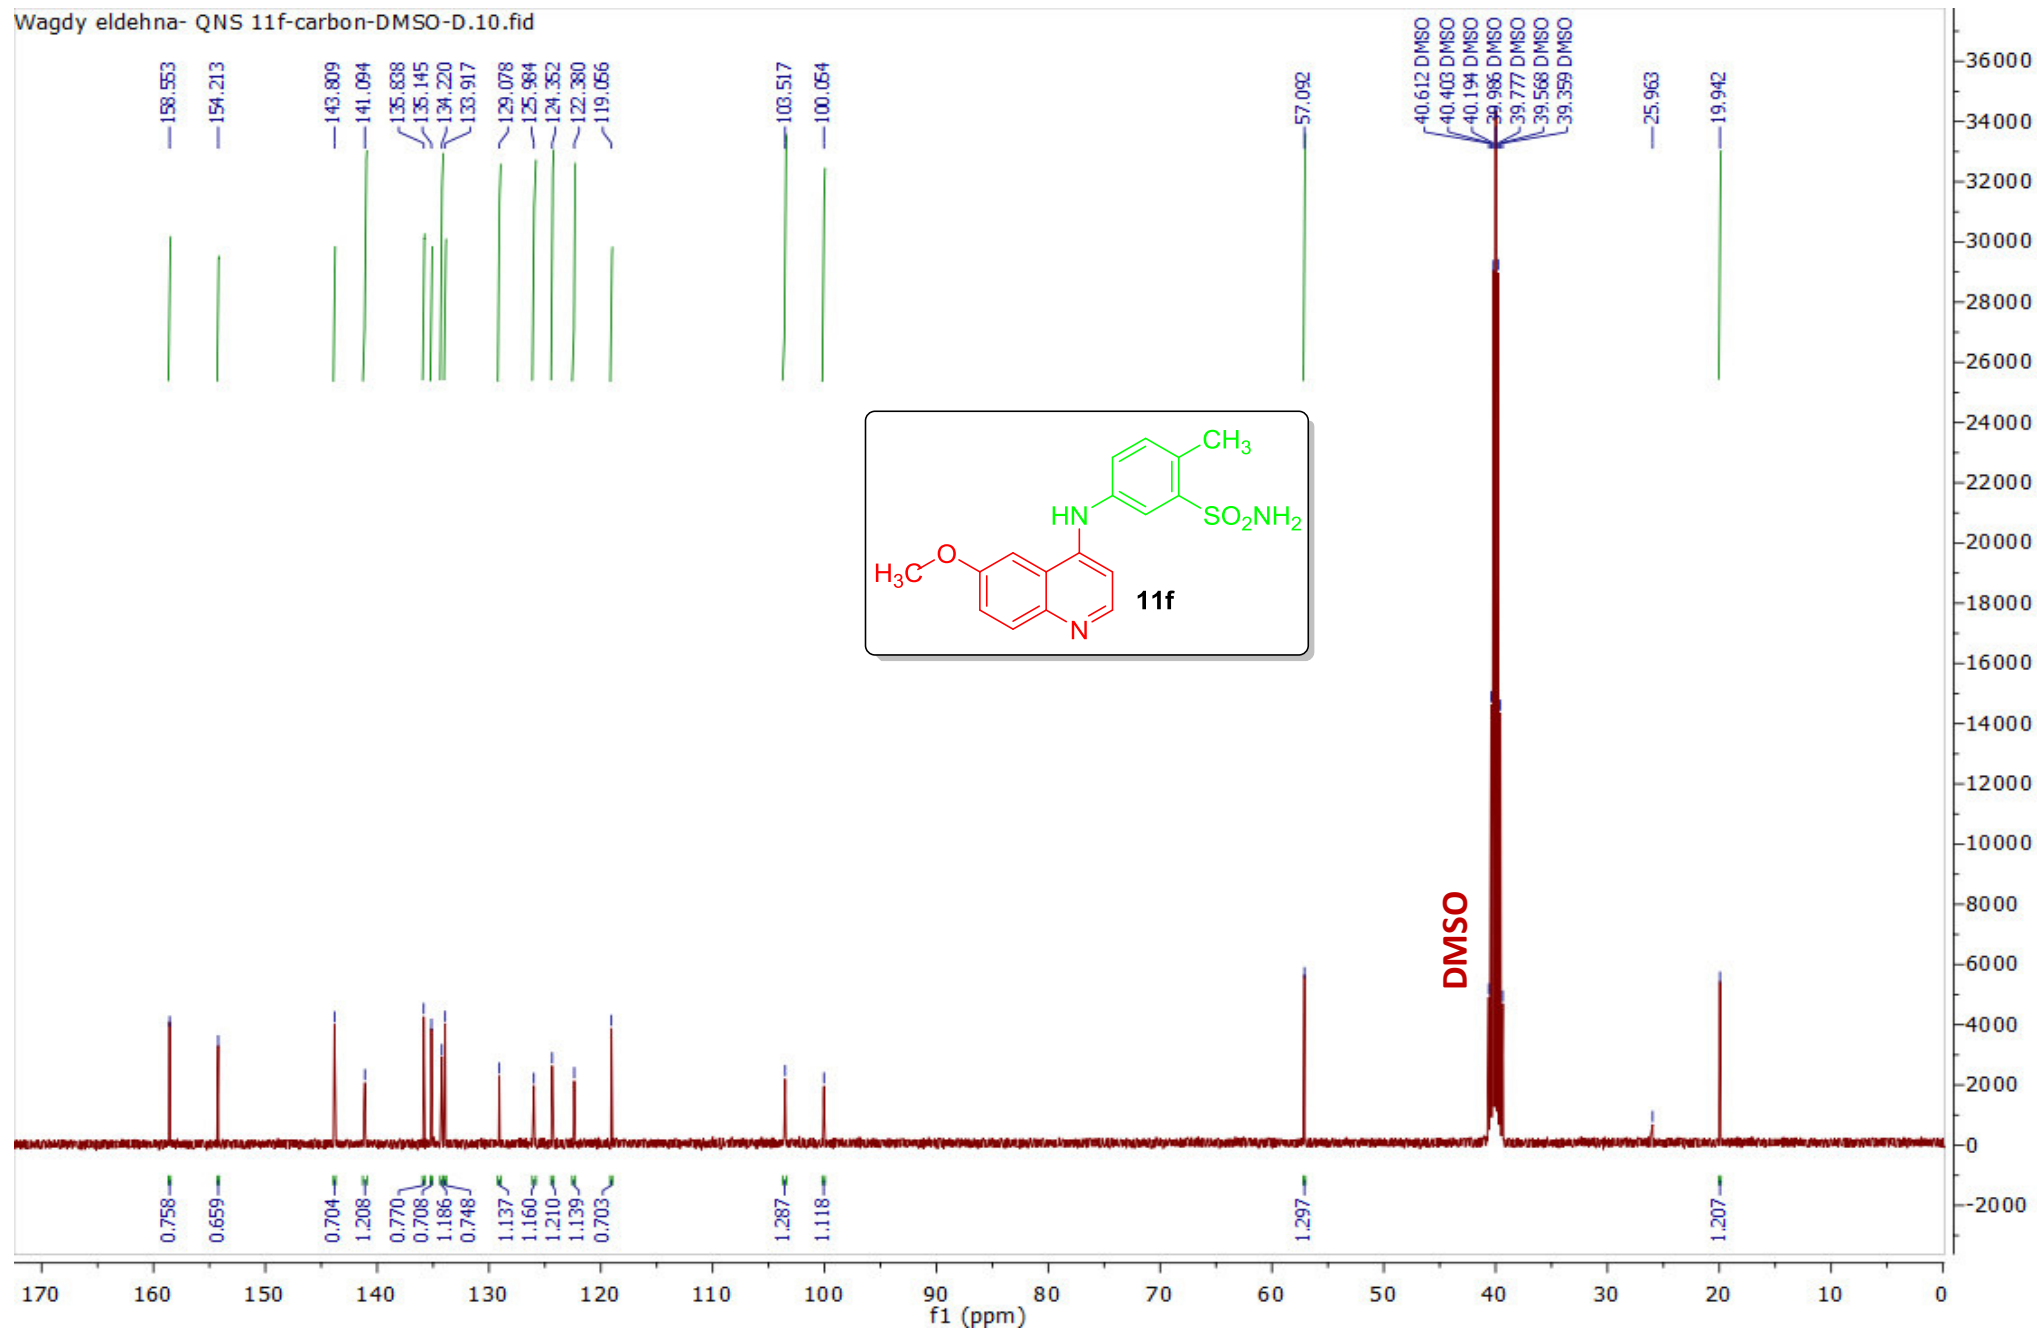



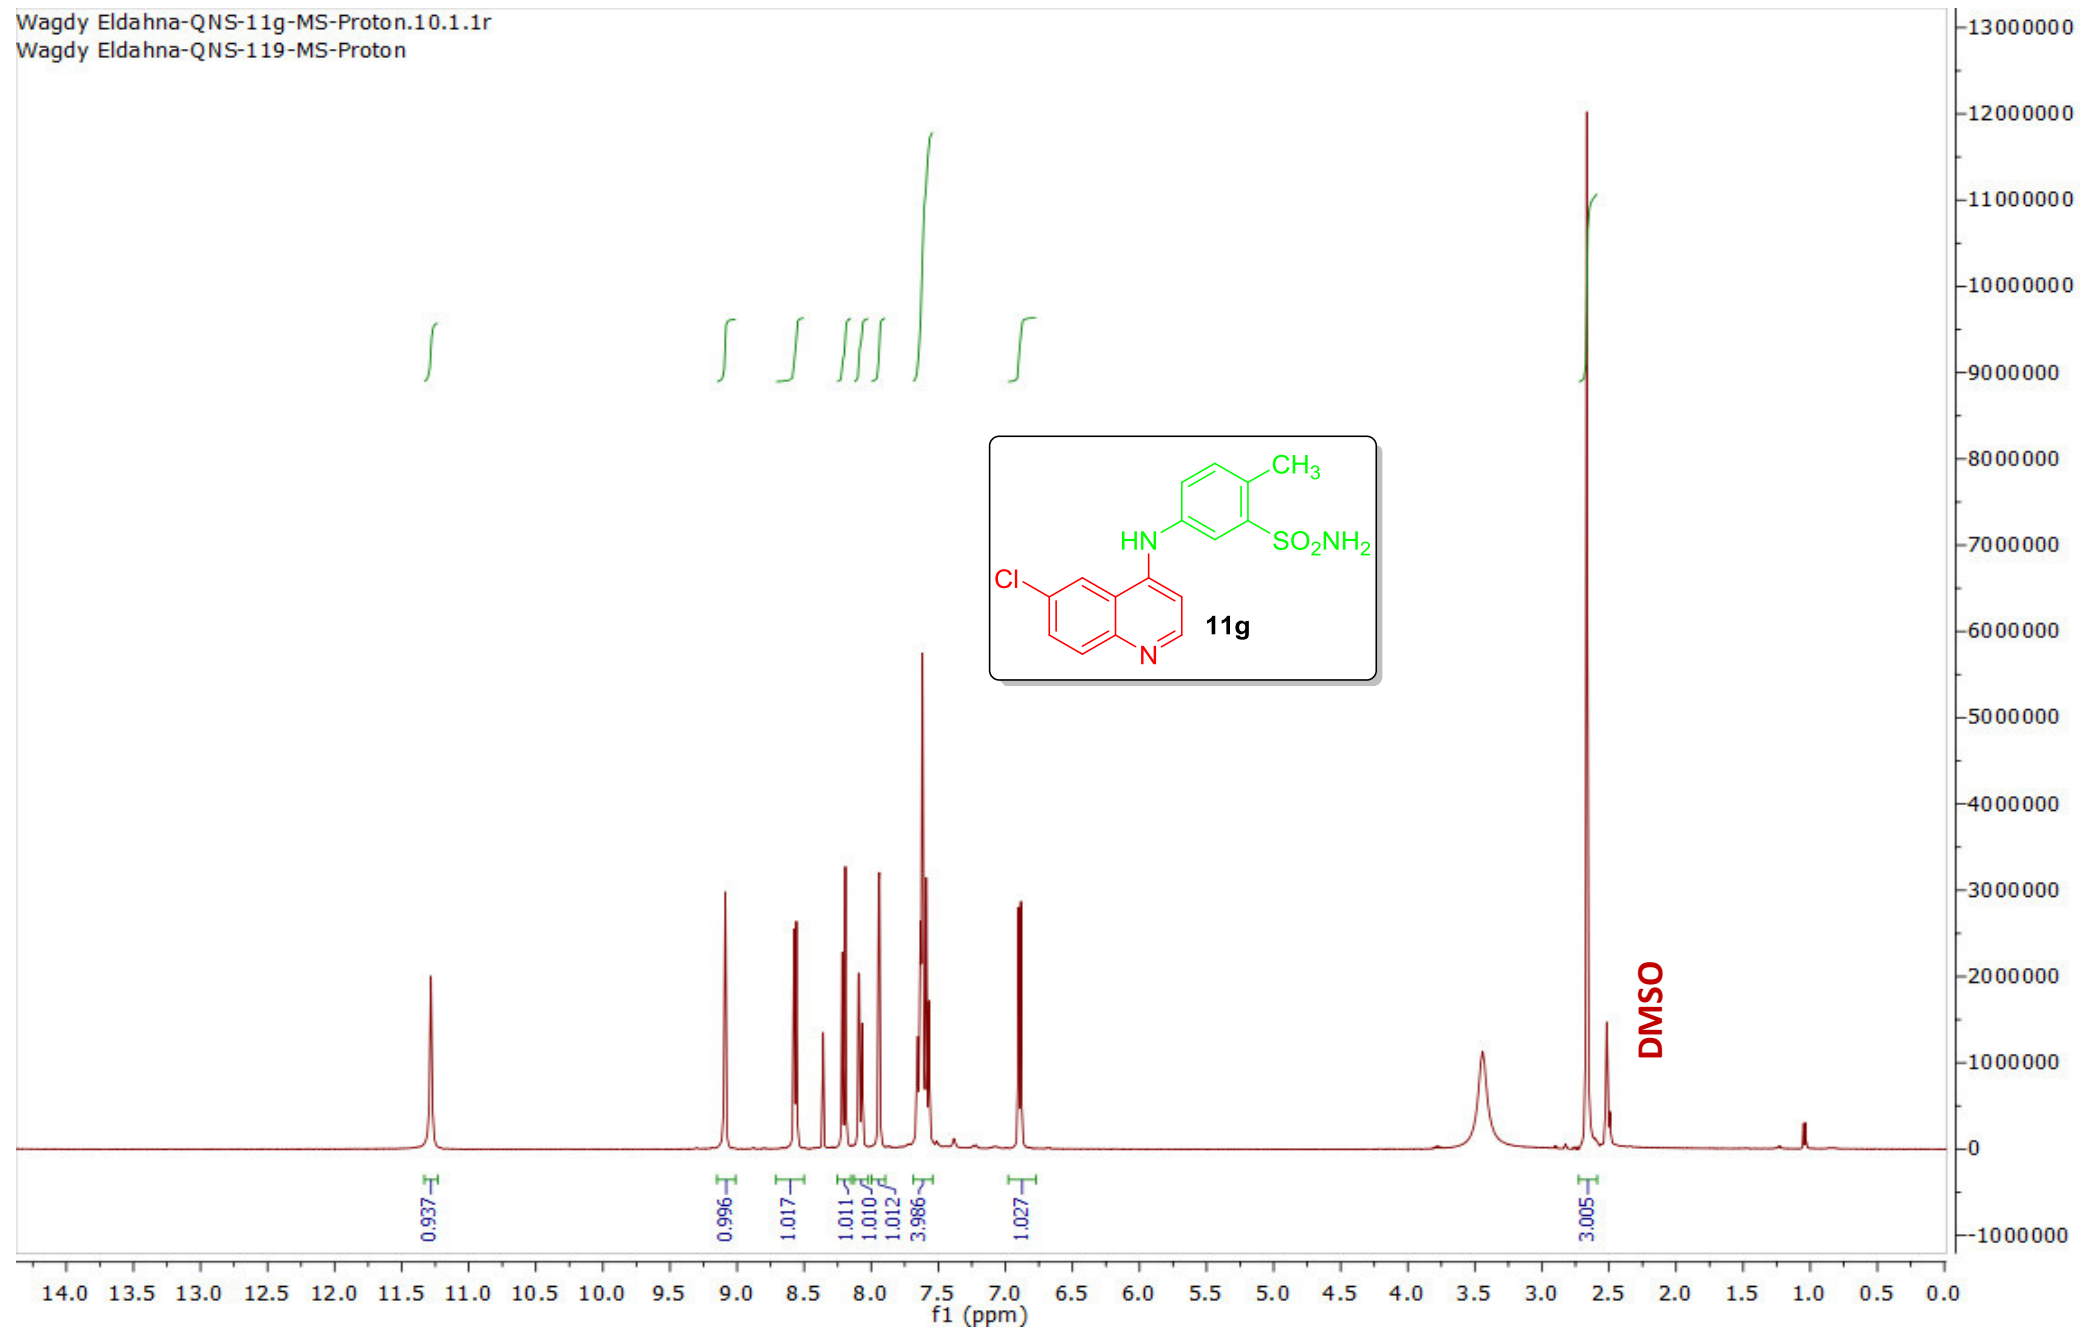

Wagdy eldehna- QNS 11g-carbon-DMSO-D.10.fid

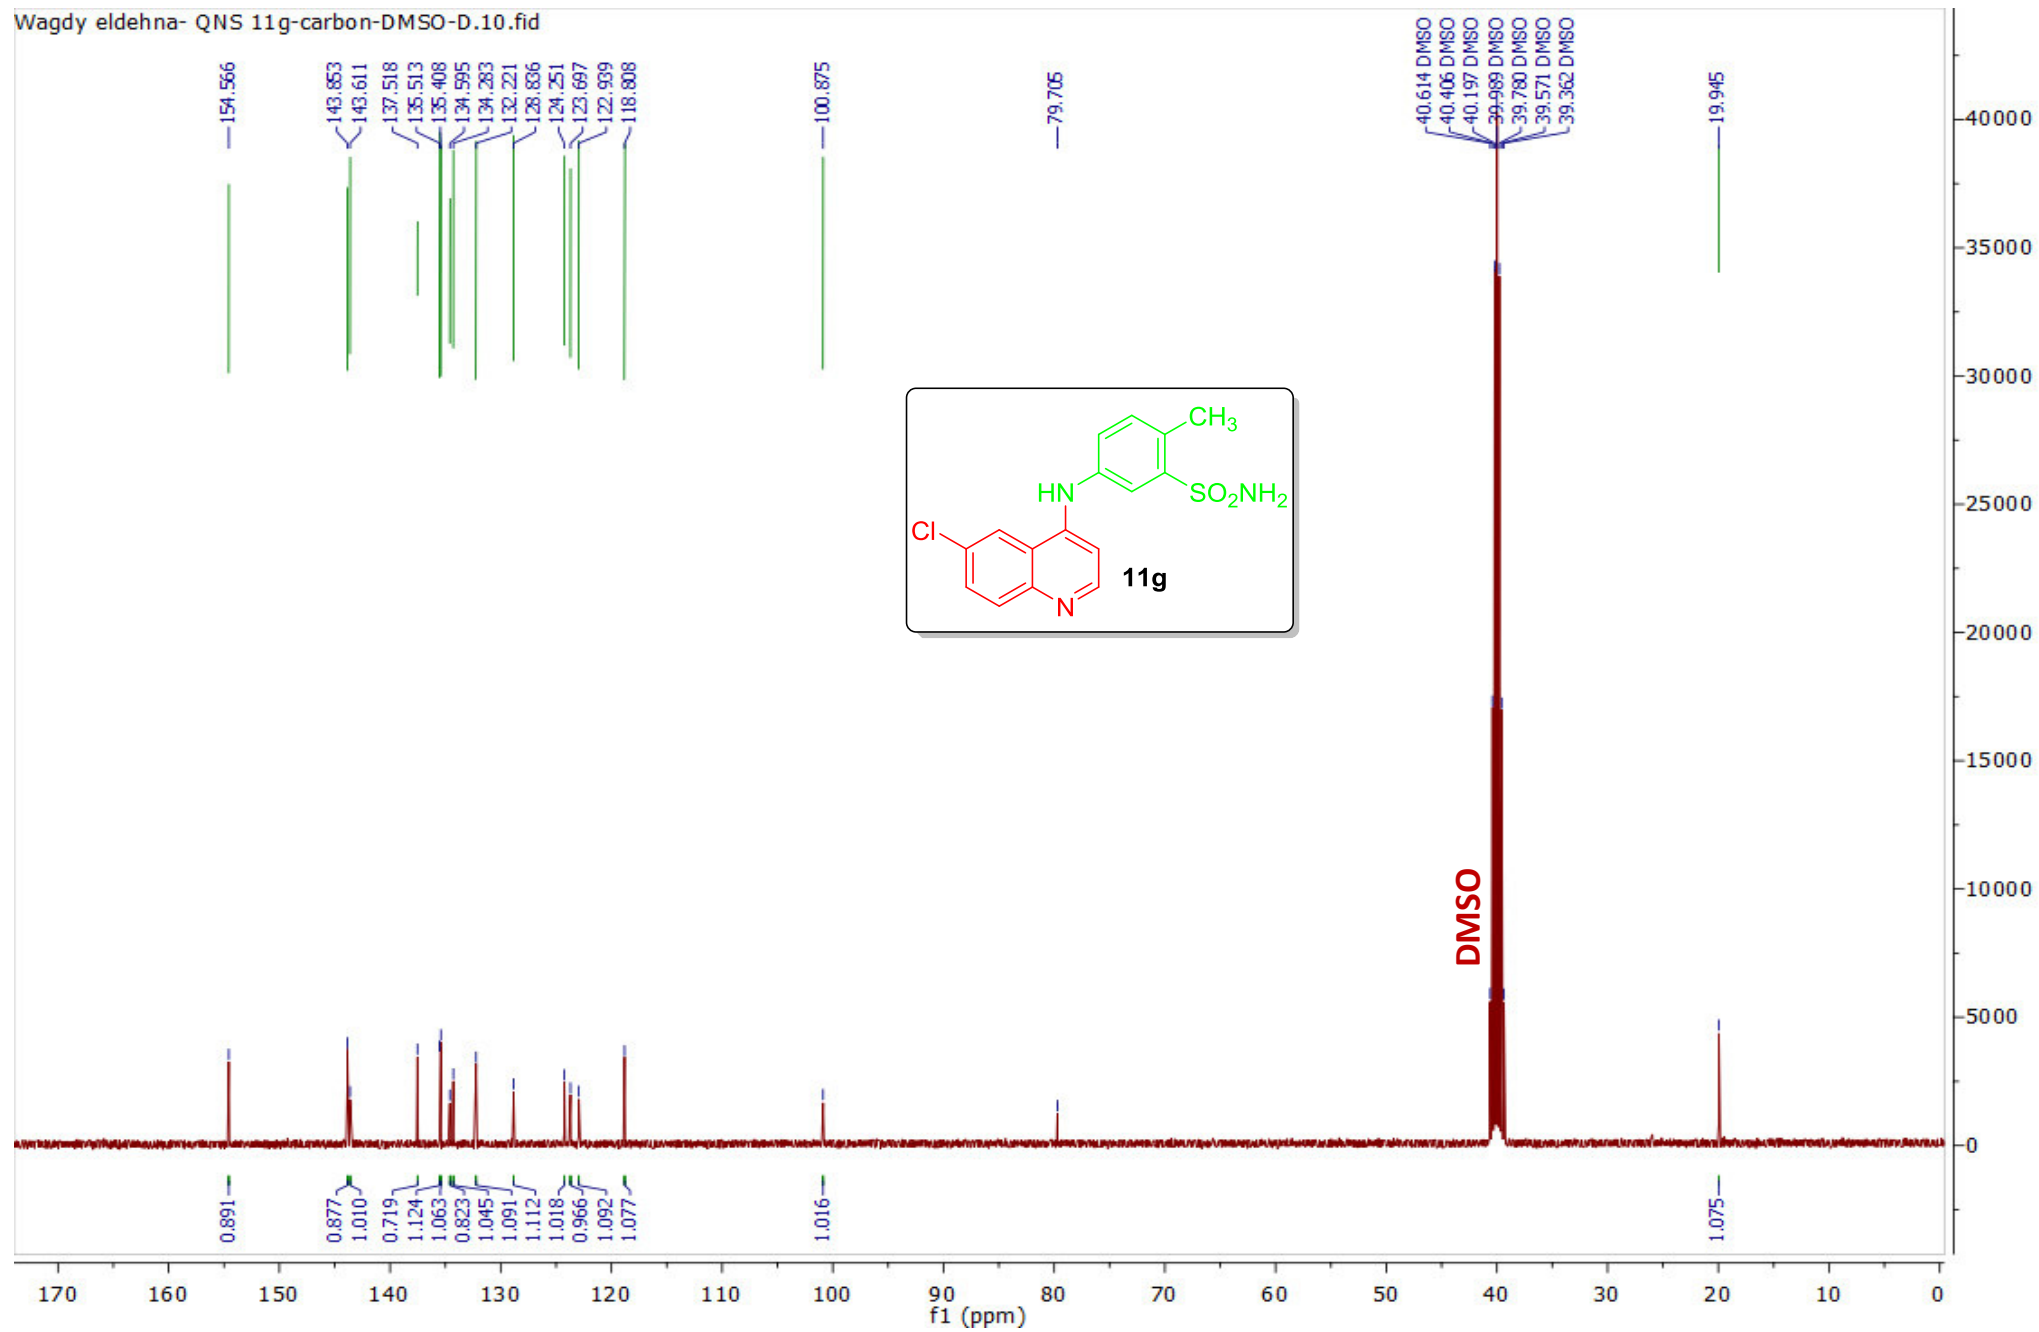

Wagdy Eldahna-QNS-13a-MS-Proton.10.1.1r  
Wagdy Eldahna-QNS-13a-MS-Proton

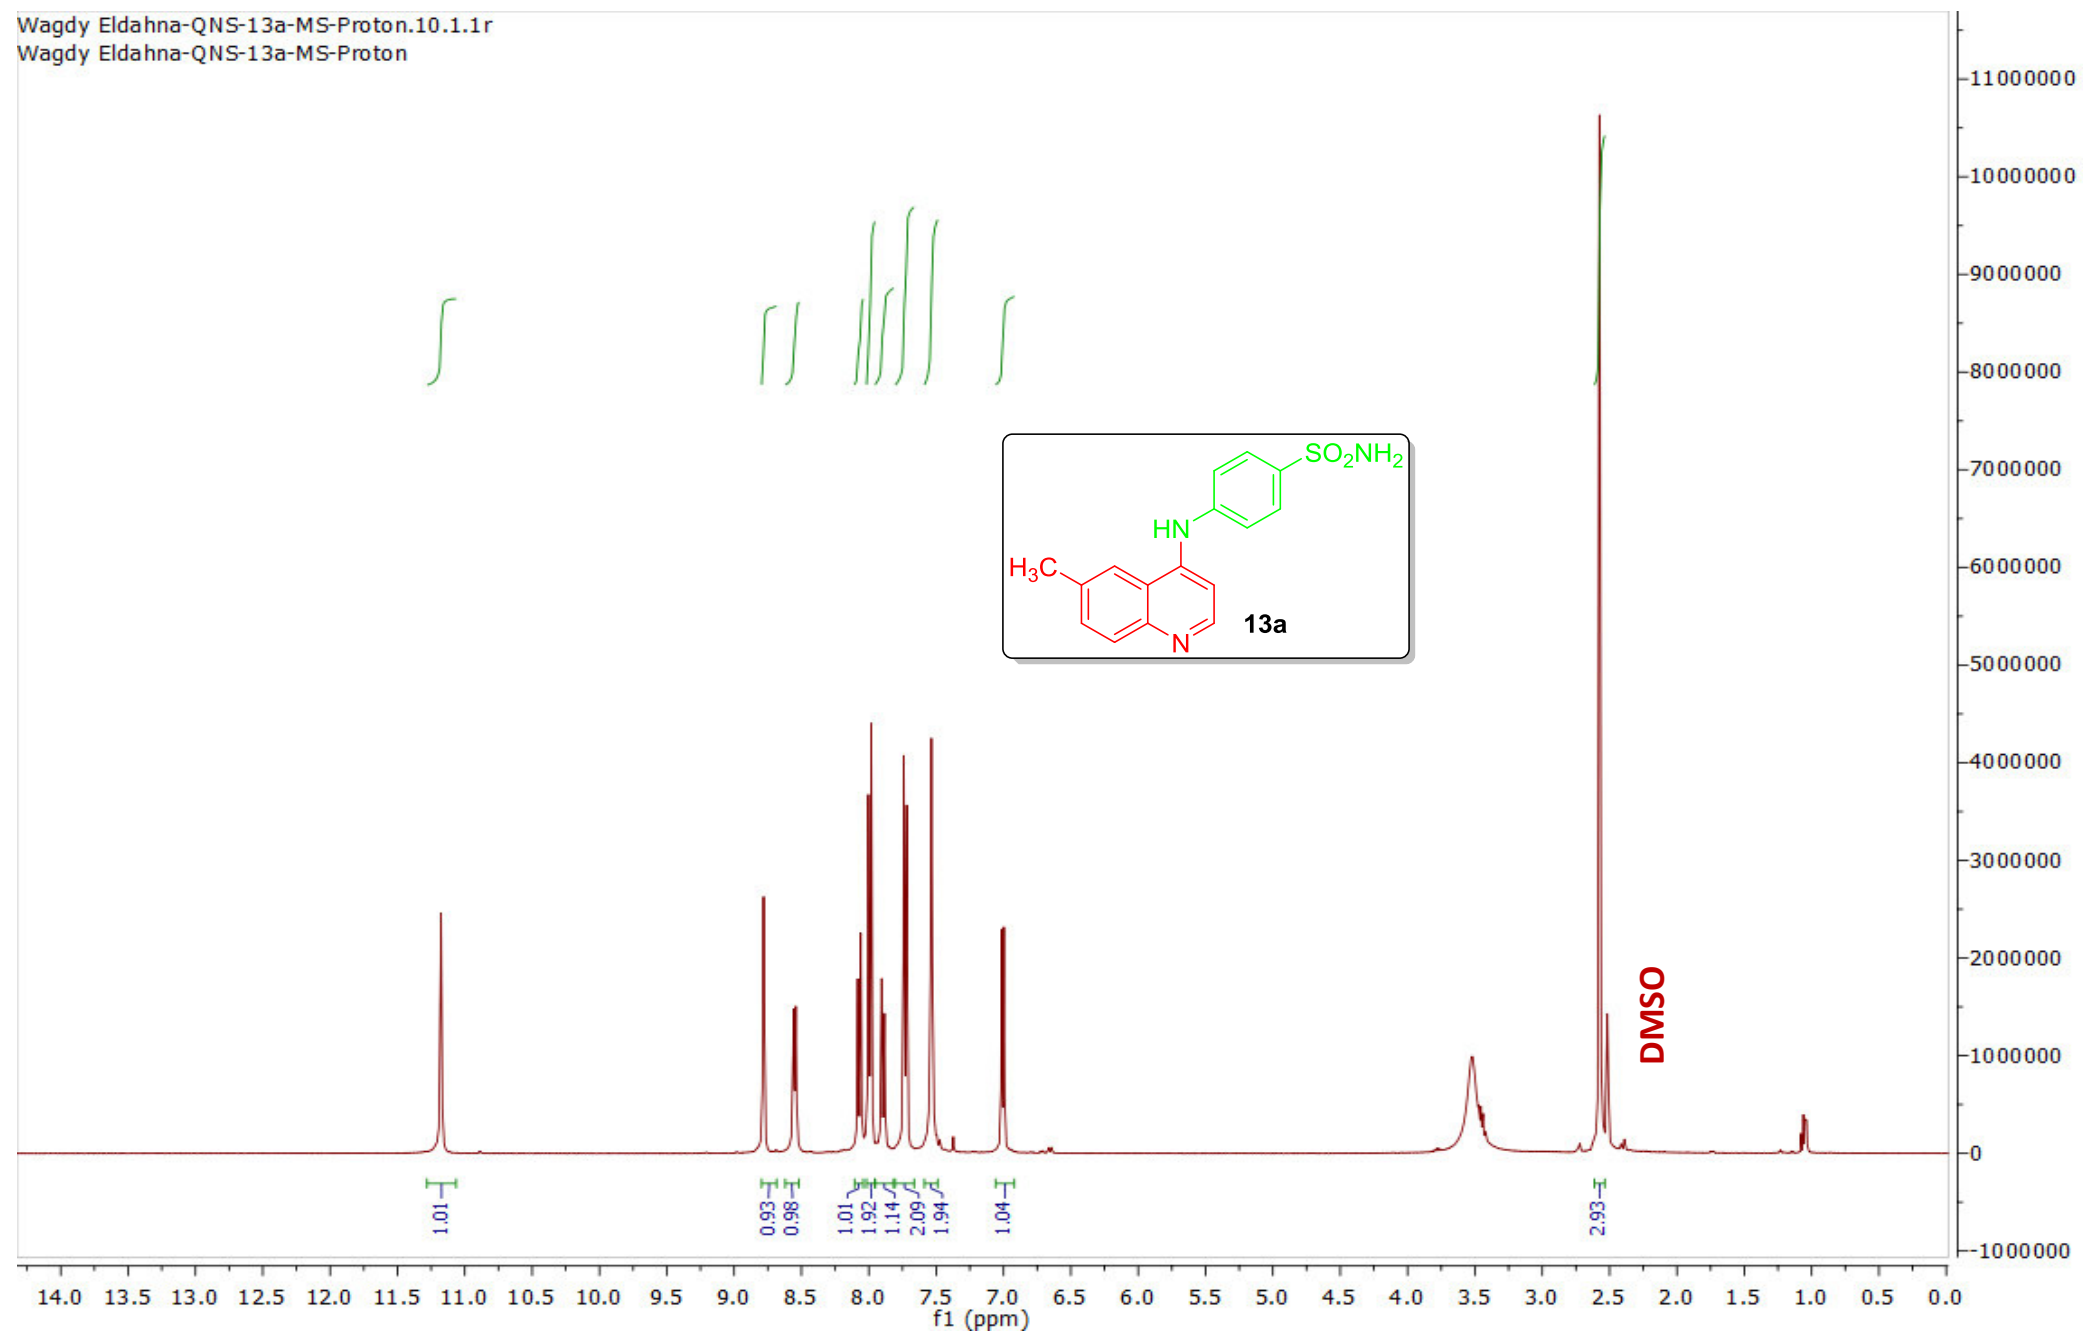

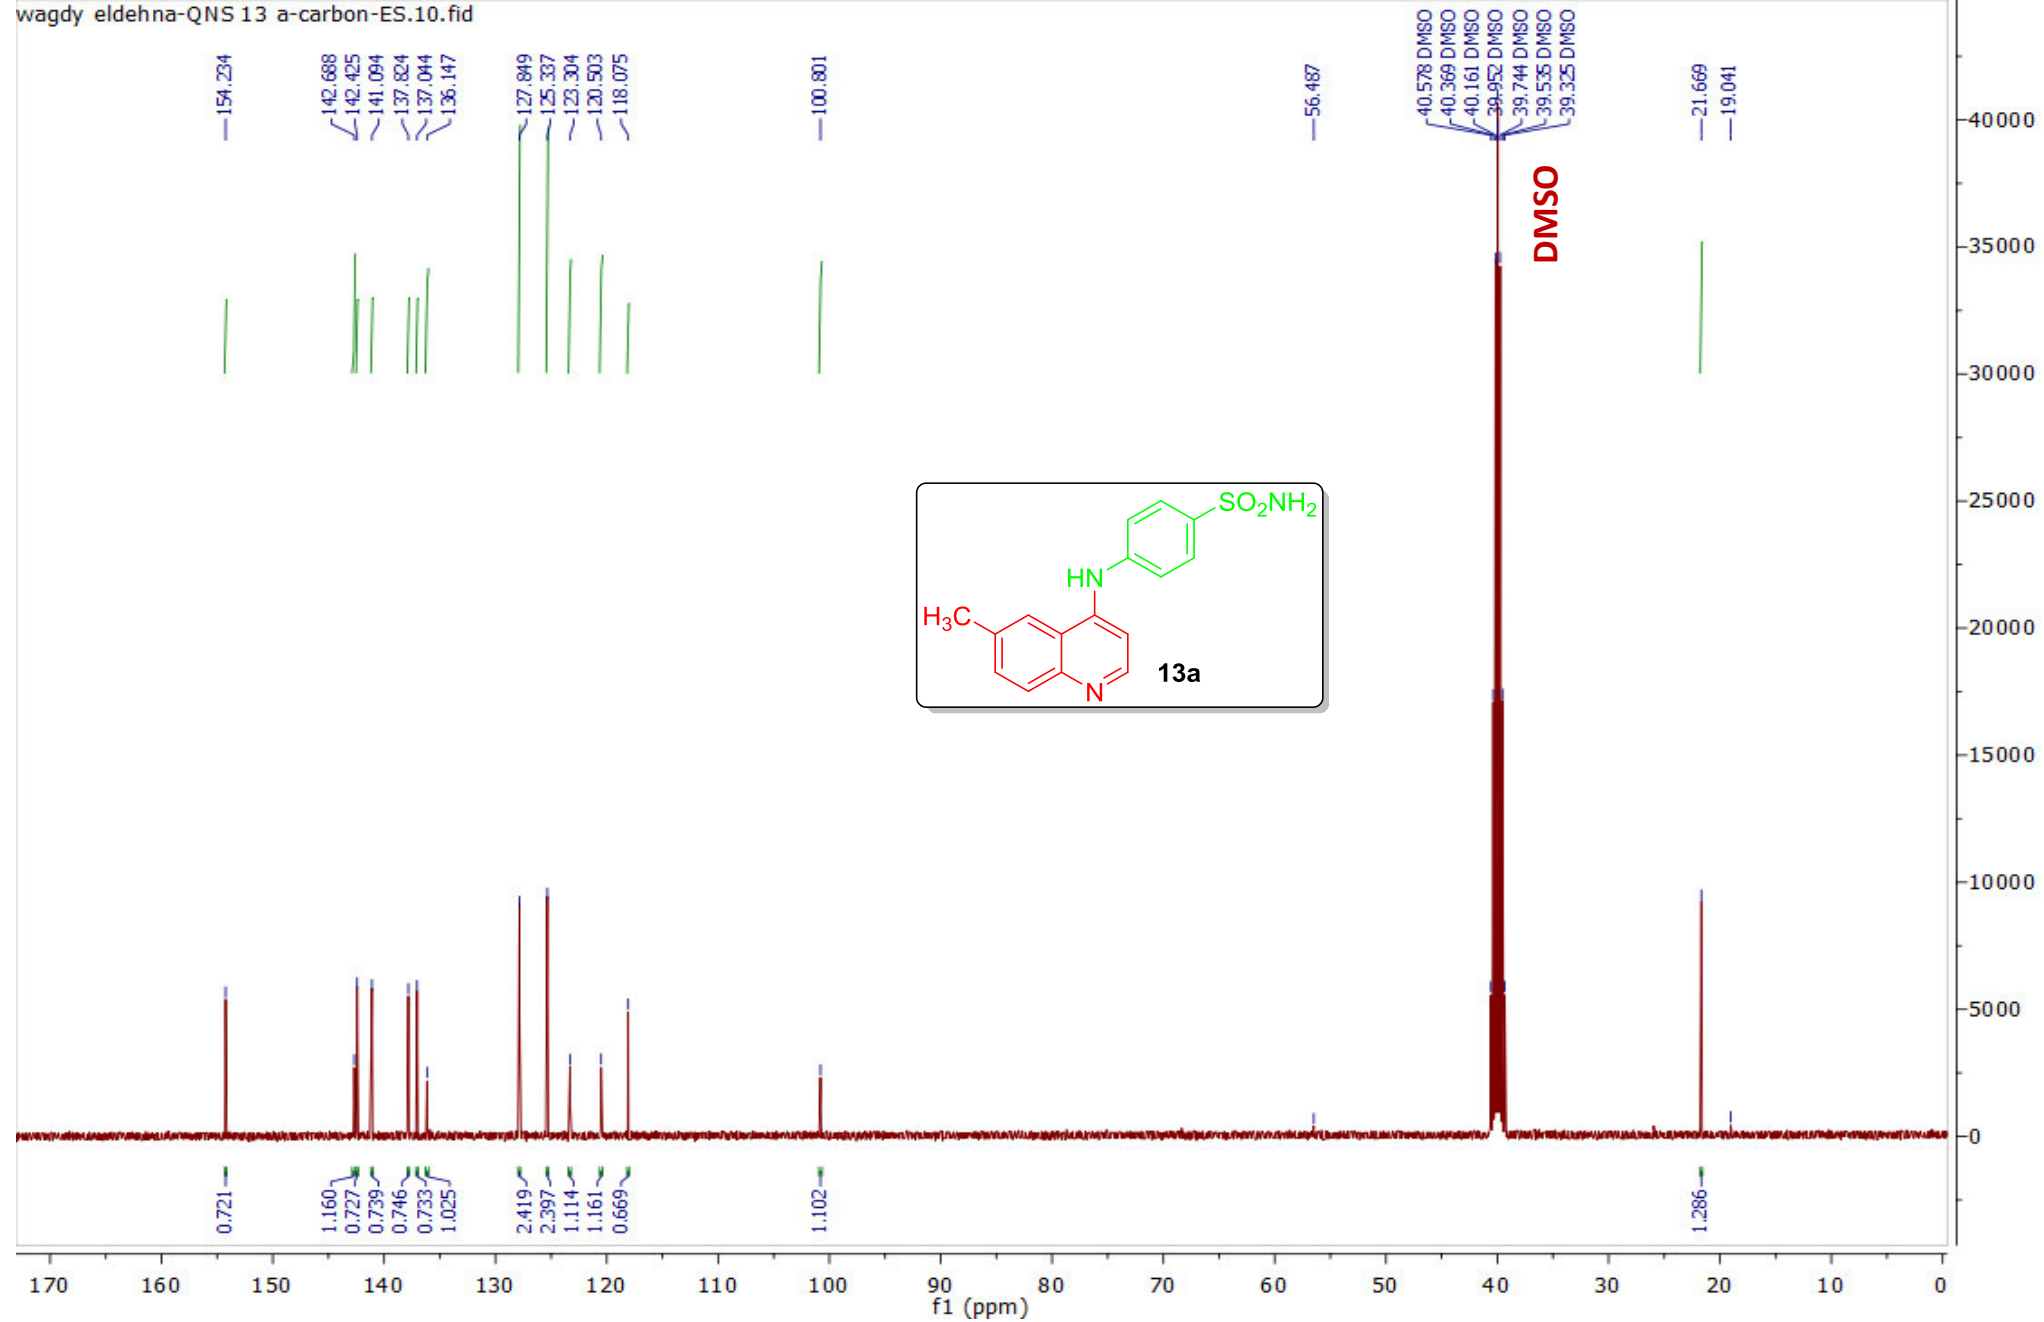

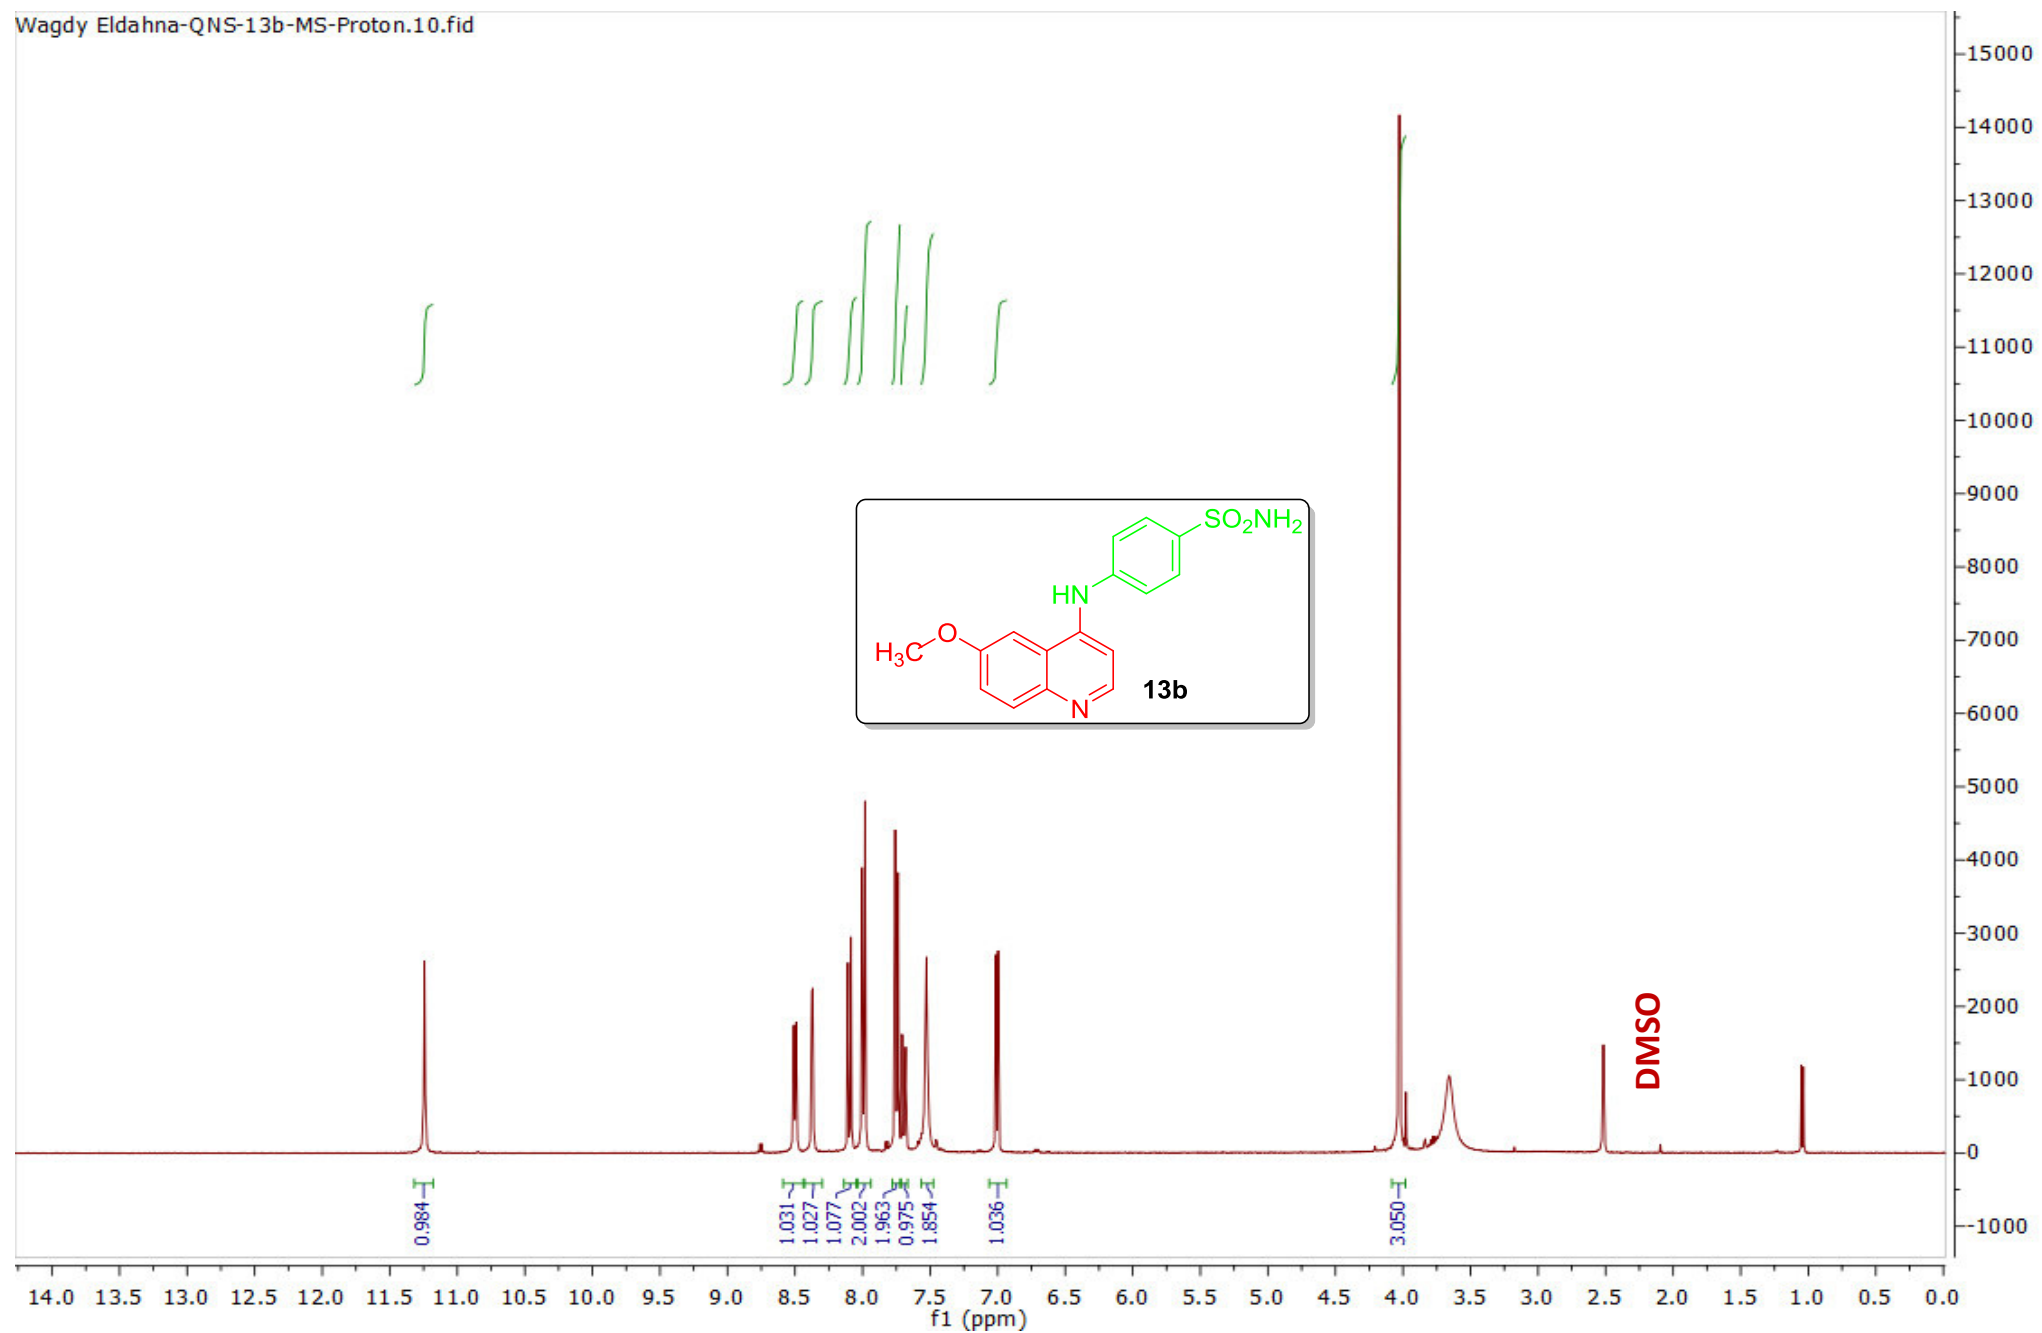

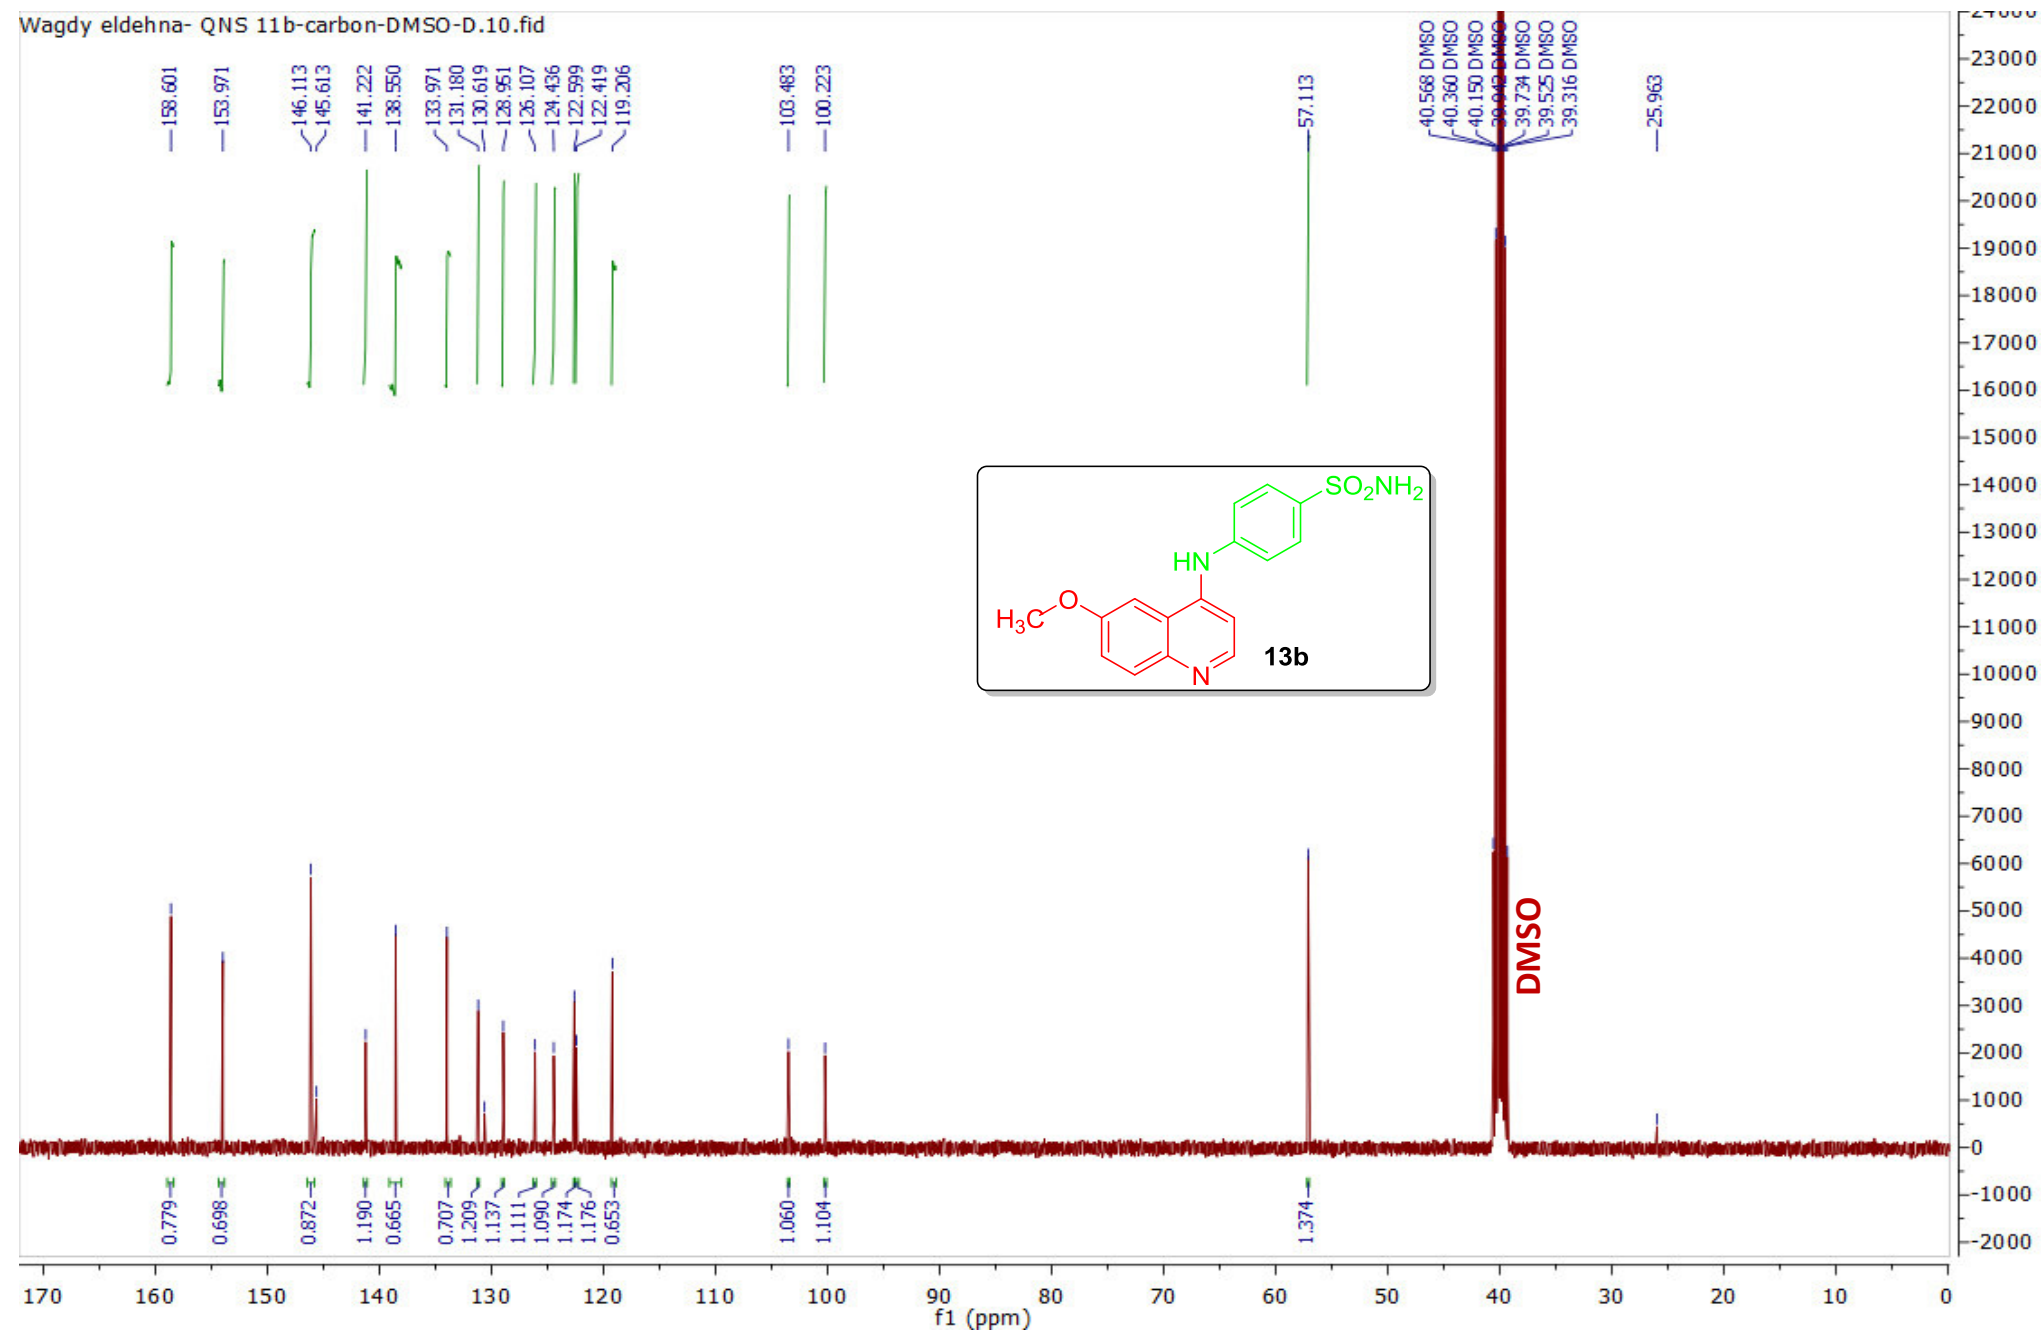

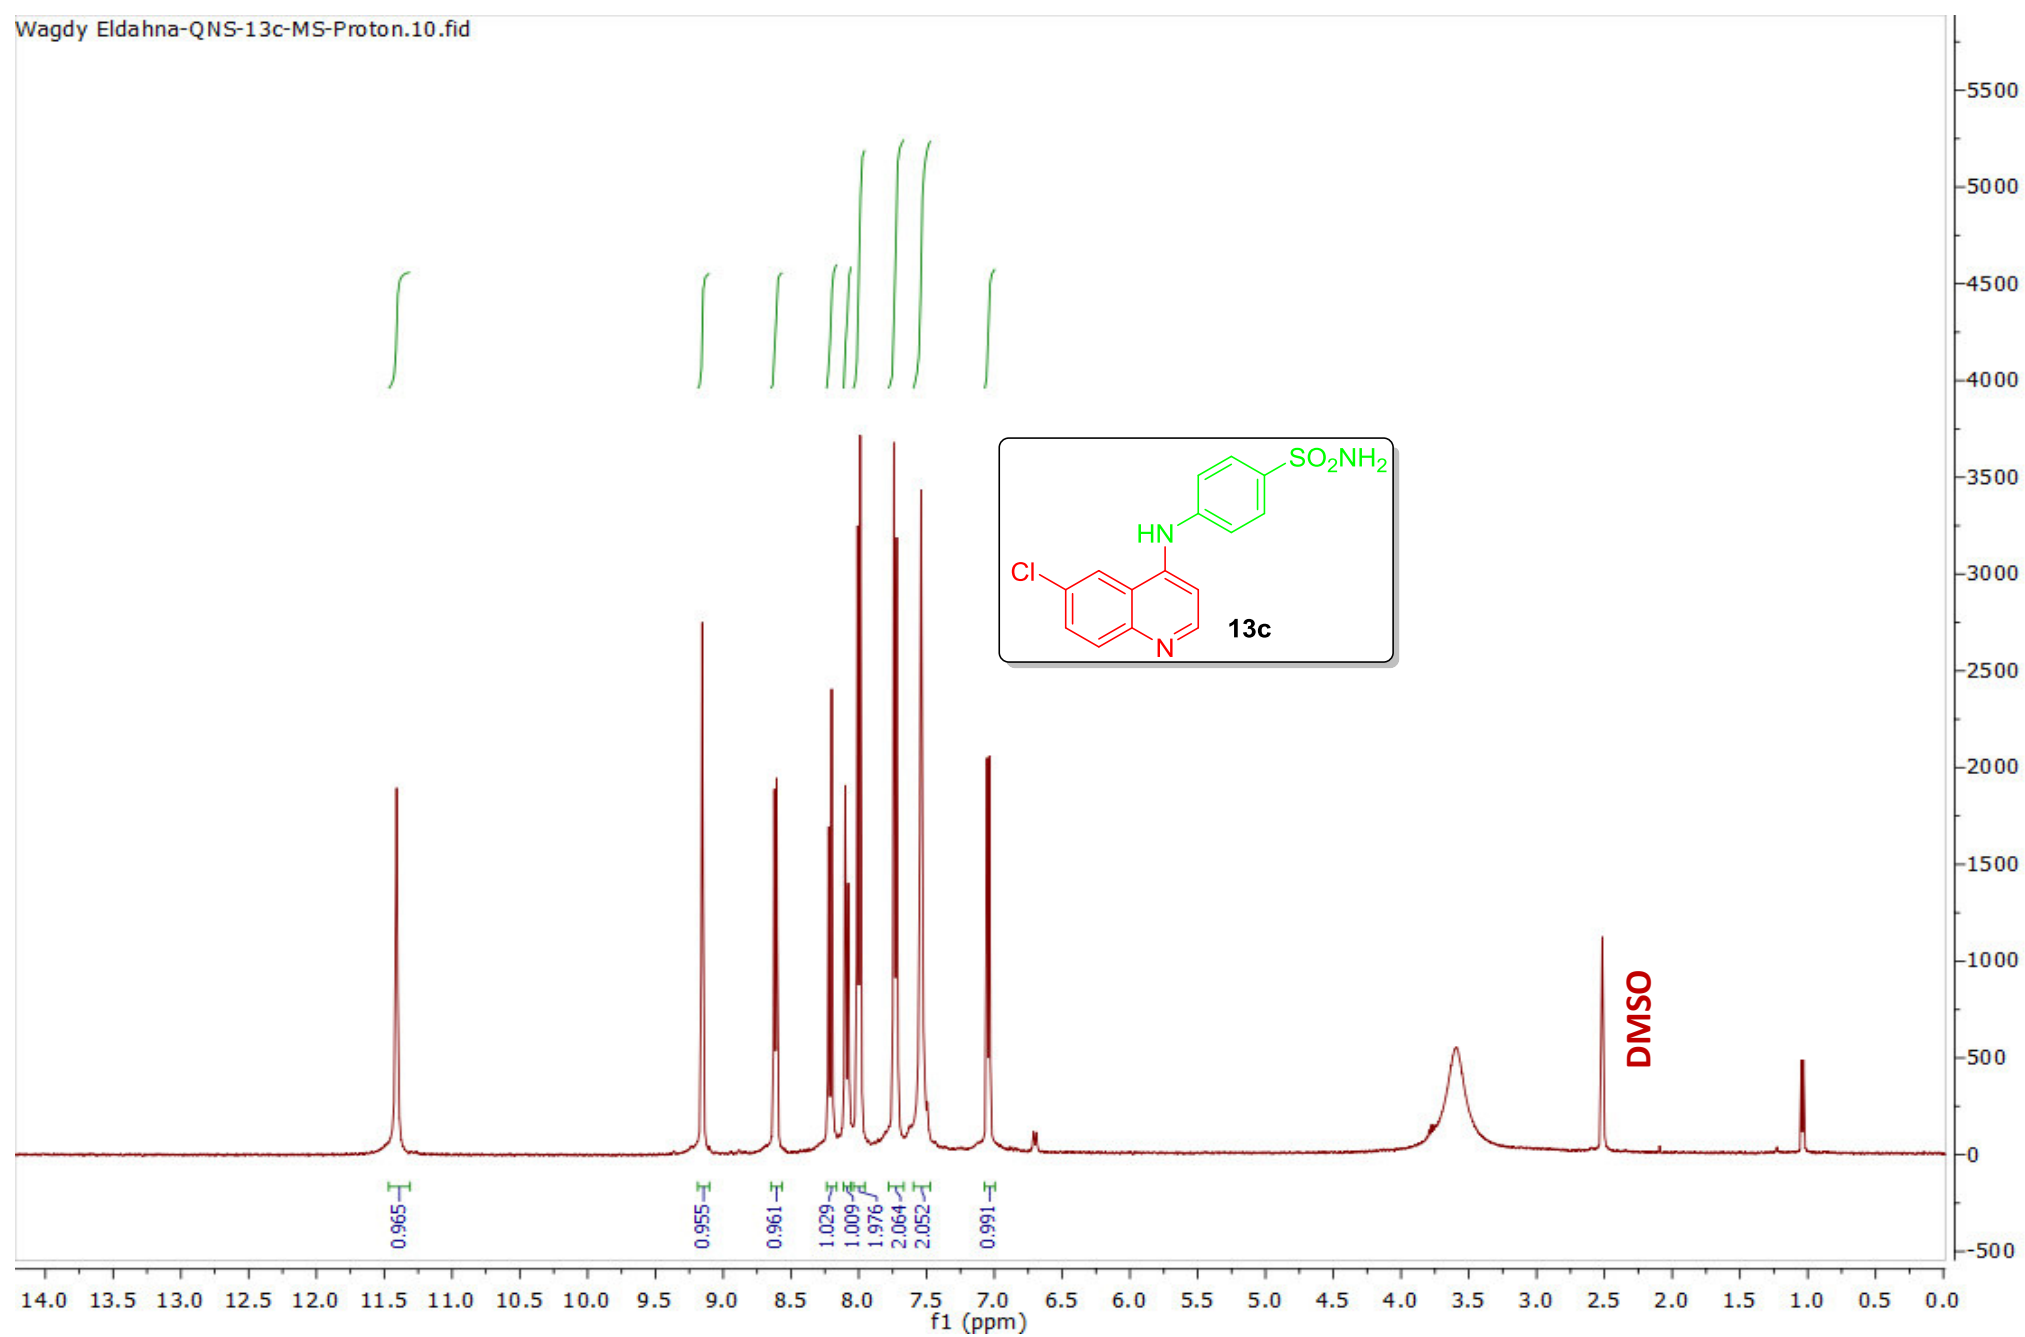

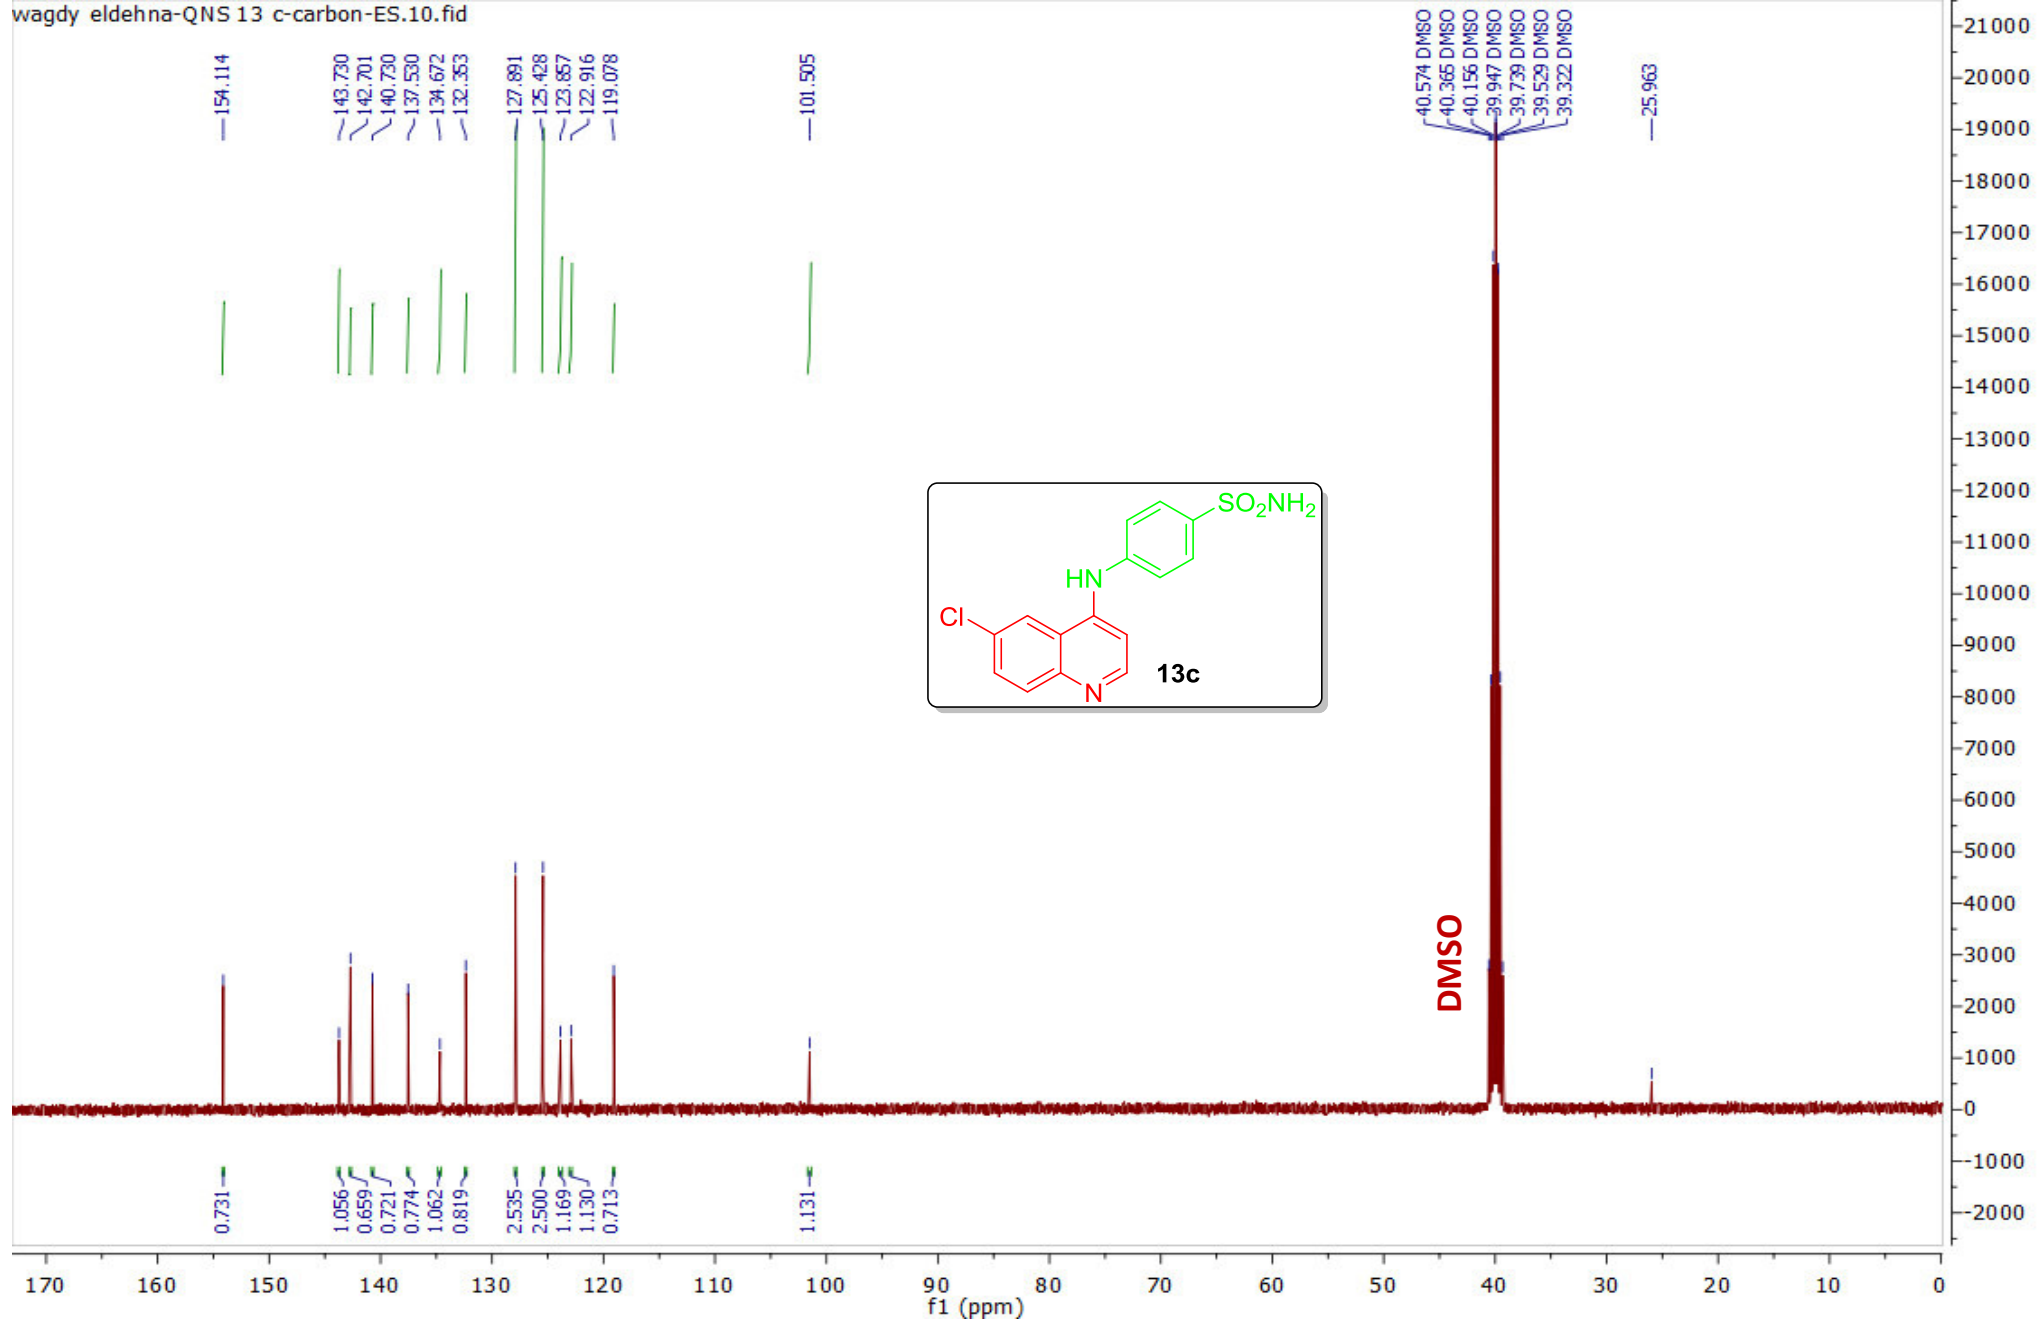



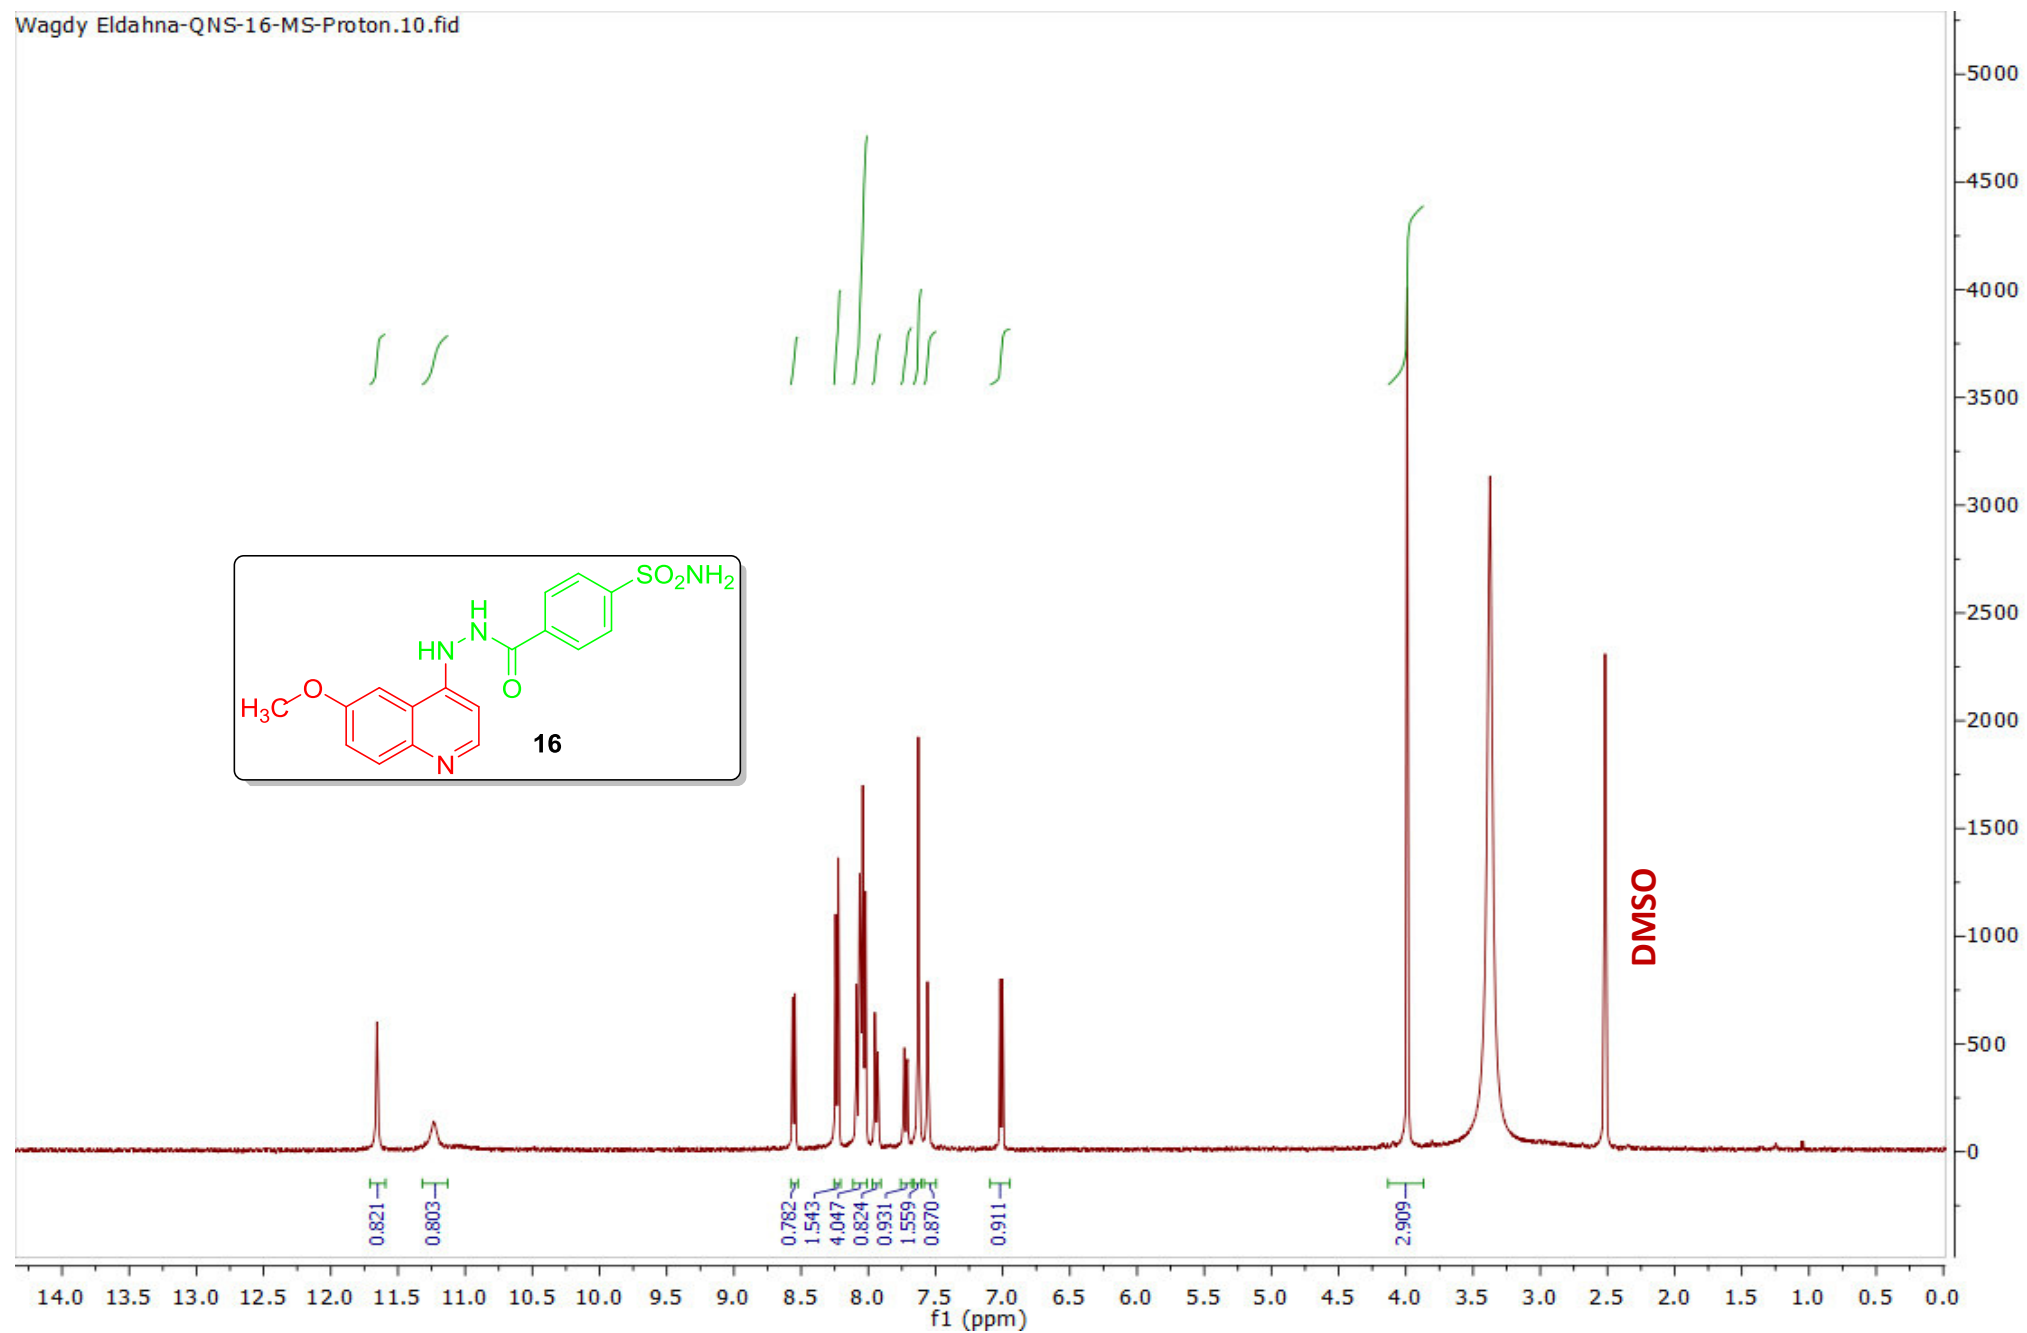

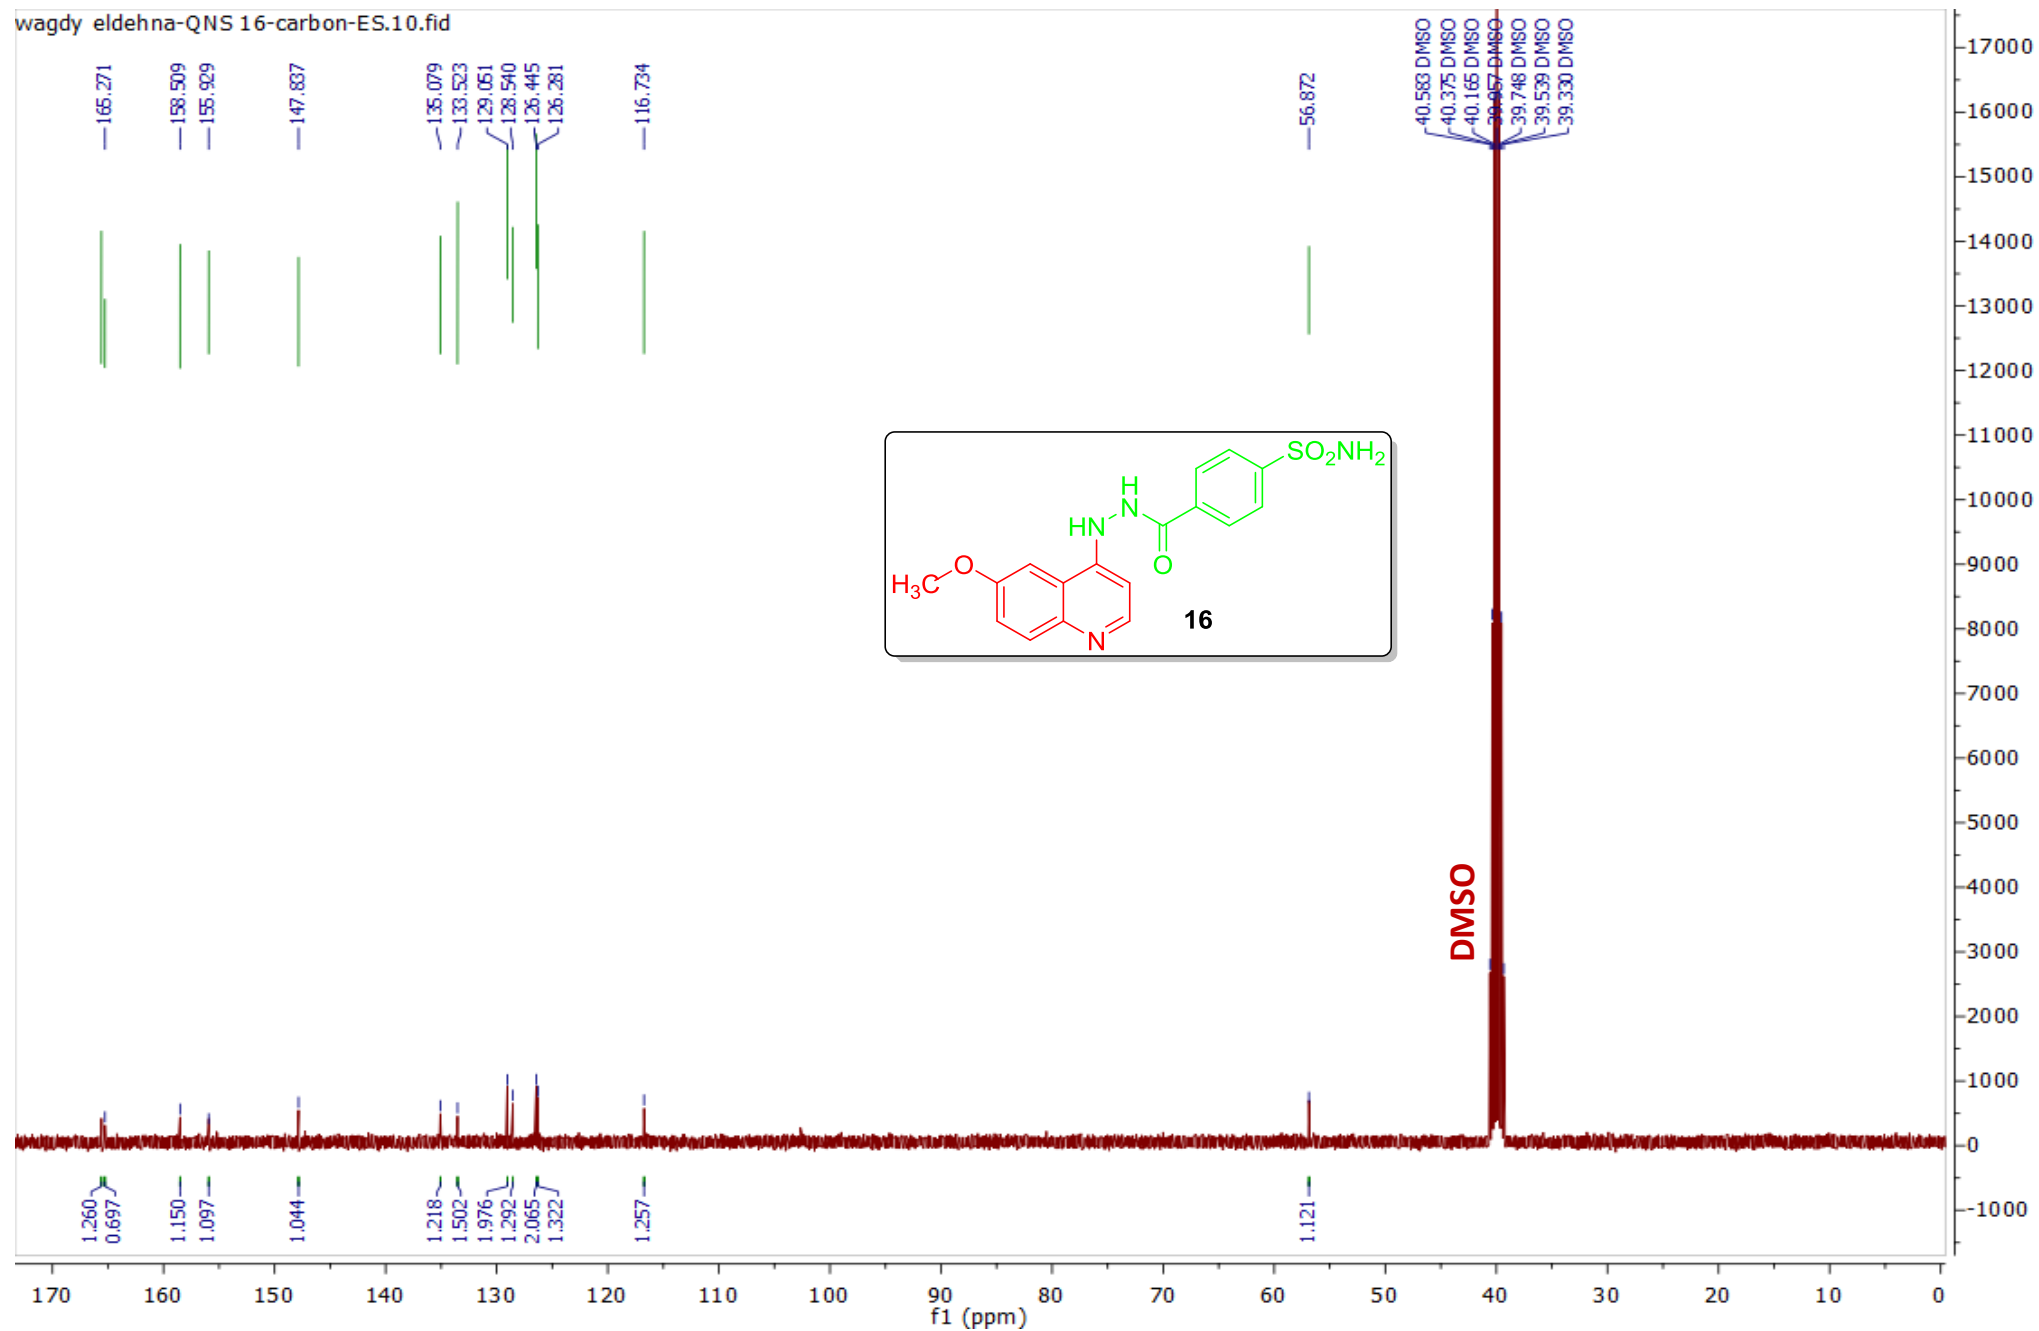

Supplement: s1 [file s1]
